# Sick plants in grassland communities: a growth-defense trade-off is the main driver of fungal pathogen abundance and impact.

Running title: growth-defense trade-off in a grassland

**Seraina L. Cappelli** (corresponding author)

Institute of Plant Sciences, University of Bern, Altenbergrain 21, 3013 Bern, Switzerland  
seraina.cappelli@ips.unibe.ch, +41 31 631 88 15, no fax

**Noémie A. Pichon**

Institute of Plant Sciences, University of Bern, Altenbergrain 21, 3013 Bern, Switzerland  
noemie.pichon@ips.unibe.ch

**Anne Kempel**

Institute of Plant Sciences, University of Bern, Altenbergrain 21, 3013 Bern, Switzerland  
anne.kempel@ips.unibe.ch

**Eric Allan**

Institute of Plant Sciences, University of Bern, Altenbergrain 21, 3013 Bern, Switzerland  
eric.allan@ips.unibe.ch

Keywords: fungi, infection, pathogen, growth-defense trade-off, grassland, biodiversity experiment, exclusion experiment, specific leaf area, nitrogen, diversity, fungicide

## ABSTRACT

Aboveground fungal pathogens can substantially reduce biomass production in grasslands. However, we lack a mechanistic understanding of the drivers of fungal infection and impact. Using a global change biodiversity experiment we show that the trade-off between plant growth and defense is the main determinant of fungal infection in grasslands. Nitrogen addition only indirectly increased infection via shifting plant communities towards more fast growing species. Plant diversity did not decrease infection, likely because the spillover of generalist pathogens or dominance of susceptible species counteracted dilution effects. There was also evidence that fungal pathogens reduced biomass more strongly in diverse communities. Further, fungicide altered plant-pathogen interactions beyond just removing pathogens, probably by removing certain fungi more efficiently than others. Our results show that fungal pathogens have large effects on plant functional composition and biomass production and highlight the importance of considering changes in pathogen community composition to understand their effects.

## 1 INTRODUCTION

2 Pathogenic fungi are omnipresent in the environment and have large impacts on their hosts (Fisher *et al.*  
3 2012). Many studies have looked at species-specific (fungus-plant) interactions (e.g. Thrall & Burdon  
4 2003, Roscher *et al.* 2007), however, only a few experiments have investigated fungal pathogens in  
5 whole plant communities, by manipulating pathogen access to their hosts (Peters & Shaw 1996; Mitchell  
6 2003; Allan *et al.* 2010; Borer *et al.* 2015; Heckman *et al.* 2017). These studies show fungal pathogens  
7 can have large top-down effects, even reducing grassland biomass production as much as insect  
8 herbivores (Allan *et al.* 2010; Seabloom *et al.* 2017). However, effects can be context dependent and  
9 factors such as plant species composition (Mitchell *et al.* 2002; Rottstock *et al.* 2014) or environmental  
10 factors (Mitchell *et al.* 2003) can determine infection rates and pathogen impact. Increasing our  
11 knowledge about causes and consequences of fungal pathogens is important to predict effects of global  
12 change, e.g. nitrogen enrichment. Nitrogen input can alter pathogen infection (Burdon *et al.* 2006) but  
13 the mechanisms by which it does so and the consequences for pathogen abundance and impact are poorly  
14 understood.

15 Key determinants of infection success and consequences of infection are related to pathogen  
16 transmission, host resistance and host tolerance to infection (as discussed in detail by Keesing *et al.*  
17 (2006)). Transmission and resistance should directly influence the observed levels of infection, while  
18 tolerance should alter the negative consequences of infection for fitness or biomass production and, if a  
19 tolerant species is a good reservoir host, the infection levels in other species (spillover, Power & Mitchell  
20 (2004)). All of these factors can be influenced by environmental variables and might trade-off with each  
21 other.

22 Pathogen resistance and tolerance are linked to plant growth strategy. Plants face a trade-off between  
23 growth and enemy defense (***growth-defense trade-off***). Plant species adapted to resource-rich  
24 environments grow fast but are often less defended against enemies, including herbivores (Endara &  
25 Coley 2011; Lind *et al.* 2013) and fungal pathogens (Blumenthal *et al.* 2009; Liu *et al.* 2017). Fast-  
26 growing species are likely to better tolerate enemies, as the loss of plant tissue can easily be replaced

27 (Gianoli & Salgado-Luarte 2017). Hence, plant communities dominated by fast-growing species should  
28 display higher pathogen infection but lose less biomass to pathogens than communities dominated by  
29 slow-growing plants from resource-poor environments. The leaf economics spectrum distinguishes these  
30 strategies and is indicated by several functional traits. Slow-growing species with long-lived, structurally  
31 expensive leaves, with low nutrient contents occur at one end of the spectrum and fast-growing species  
32 with a high turnover of short-lived, nutrient-rich leaves at the other end (Wright *et al.* 2004). Some of  
33 these traits are also directly related to resistance to natural enemies, e.g. leaf nutrient concentrations  
34 (Robinson & Hodges 1981). Although the growth-defense trade-off hypothesis is well supported for  
35 individual plant-pathogen interactions, we know little about how it scales up to whole plant communities  
36 and its importance relative to other drivers of infection.

37 Another possible driver of infection is the nutrient supply in plant communities. High nitrogen supply  
38 can lead to decreased infection resistance with fungal pathogens (*nitrogen-disease hypothesis*, Dordas  
39 2008). Nitrogen disease effects are mainly known from agriculture, while studies in natural ecosystems  
40 show more variable results (Mitchell *et al.* 2003; Veresoglou *et al.* 2013). This variation may be partly  
41 because nitrogen enrichment can also have complex indirect effects on fungal infection. Nitrogen  
42 enrichment often reduces plant species richness and changes plant functional composition by promoting  
43 fast-growing over slow-growing species (Bobbink *et al.* 2010; De Schrijver *et al.* 2011; Isbell *et al.*  
44 2013) both of which could indirectly alter fungal infection and its consequences. However, nitrogen  
45 could also directly lead to healthier and more tolerant plants. To mechanistically understand nitrogen  
46 effects on fungal infection, studies therefore need to assess the direct and indirect effects independently.

47 Plant diversity can also be a key driver of pathogen infection, through different mechanisms. Pathogen  
48 infection has been shown to decrease with greater host diversity in grasslands through changes in plant  
49 abundances (e.g. Mitchell *et al.* 2002; Liu *et al.* 2016; Rottstock *et al.* 2014; but see Halliday *et al.* 2017),  
50 which reduces host-pathogen transmission (*host dilution hypothesis*) (Civitello *et al.* 2015). However,  
51 other studies showed that diverse communities are more infected, potentially due to the spillover of  
52 generalist pathogens between plant species or due to an increase of host-density independent pathogens,  
53 such as vector-transmitted ones (Power & Mitchell 2004; Halliday *et al.* 2017). The impact of plant

54 diversity on pathogen infection may therefore depend on the relative abundance of specialist and  
55 generalist pathogens and on their transmission mode. Plant diversity might also change pathogen  
56 community composition by selecting for more generalist species (Thrall *et al.* 2007) and this could  
57 potentially alter the impact of pathogens if specialists and generalists differ in their virulence (Leggett  
58 *et al.* 2013). However, relatively little is known about the impact of pathogens in low and high diversity  
59 plant communities (but see Seabloom *et al.* 2017; Halliday *et al.* (2017)).

60 Changes in plant functional composition, diversity and nutrients could all affect pathogen communities  
61 by changing plant biomass and thereby altering microclimatic conditions. Pathogens generally grow  
62 better in warmer and humid conditions, but this varies between pathogen groups (Barrett *et al.* 2009).  
63 The availability of free water is often an important driver of infection (Bregaglio *et al.* 2013; Chen *et al.*  
64 2014; Sun *et al.* 2017; Bradley *et al.* 2003), suggesting that the microclimatic humidity is important.  
65 Further, increased temperature may promote overall pathogen infection (Liu *et al.* 2016), but again,  
66 different groups of fungal pathogens may react differently (Helfer 2014). We therefore lack a good  
67 understanding of how temperature and humidity impact different pathogen groups and how these effects  
68 relate to other drivers of infection.

69 The impact of pathogen infection on plant communities mainly depends on the resistance and the  
70 tolerance of plants. Impact can be assessed in two ways: comparing plots with and without fungicide,  
71 and, assessing the amount of fungal infection in a plant community and relating it to the biomass  
72 produced. The first approach would be ideal if fungicide reduced infection to zero. However, most  
73 fungicides do not completely wipe out all infection, and might be selective for certain fungal groups  
74 (e.g. Parker *et al.* 2015; Karlsson *et al.* 2014), changing fungal community composition. For example,  
75 if a fungicide is selective against the rather specialized rusts, then the fungicide might cause a shift from  
76 specialized to more generalist fungal communities. The second approach, relating infection and biomass,  
77 allows for more quantitative comparisons. However, here the direction of causality is hard to establish,  
78 as higher plant biomass might also lead to higher fungal infection, obscuring the relationship. It is  
79 therefore advantageous to use both methods, however, no previous studies have done so.

80 Here we tested the relative importance of nitrogen, plant diversity and functional composition as drivers  
81 of fungal pathogen abundance, in an experiment that manipulated these variables factorially (Figure S1,  
82 Table S1). Specifically, we tested the growth-defense trade-off hypothesis, the nitrogen-disease  
83 hypothesis and the dilution-effect hypothesis (Figure 1). Further, we assessed the fungal impact on plant  
84 biomass by comparing biomass from plots with and without fungicide, and by relating plant biomass to  
85 infection intensity in the same plots. In addition, we tested if our experimental treatments altered  
86 pathogen abundance and impact through changes in microclimatic conditions.

## 87 MATERIALS AND METHODS

### 88 Experiment

89 We set up a large field experiment (PaNDiv Experiment) in the Swiss lowlands (mean annual  
90 temperature and precipitation  $9.4\pm 0.1^{\circ}\text{C}$ , respectively  $1021.62\pm 31.89\text{mm}$ , MeteoSchweiz 2019) on a  
91 formerly extensively managed grassland in autumn 2015. The experiment consisted of 336 2m x 2m  
92 plots. We factorially manipulated plant species richness, plant functional composition (gradient of  
93 specific leaf area as a measure of growth strategy), nitrogen addition and foliar fungal pathogen  
94 exclusion. We used a set of 20 common grassland species spanning a large gradient of specific leaf area  
95 (SLA) to establish the experimental plant communities and divided them into fast (high SLA) and slow  
96 (Low SLA) growing (Table S2). The experimental communities contained either 1, 4, 8 or 20 species.  
97 Plots with 4 or 8 species could contain only slow, only fast or a mix of species, creating a large gradient  
98 in community mean SLA values. Monocultures spanned the full range in SLA values while plots with  
99 20 species inevitably had an intermediate mean SLA. The communities had fully developed by late  
100 summer 2016. To maintain species compositions, the plots were weeded three times a year. Plots were  
101 mown once in the middle of June and once in August (for more details see Supplementary Methods and  
102 Pichon *et al.* 2019).

103 Each specific community composition received crossed nitrogen and fungicide treatments. Nitrogen (N)  
104 enrichment plots received  $100\text{ kgNha}^{-1}\text{y}^{-1}$ , added once in April and once after the first mowing, in the  
105 form of urea. This is typical of fertilization experiments (Hautier *et al.* 2014) and medium - intensive

106 farming (Bluethgen *et al.* 2012). Foliar fungal pathogen exclusion was done with fungicide (Score Profi  
107 by Syngenta Agro AG, 24.8% difenoconazole and Ortiva by Syngenta Agro GmbH, 22.8% azoxistrobin)  
108 applied four times during the growing season (0.2ml of Score Profi and 0.4ml of Ortiva mixed with  
109 0.062l of water per treated plot each time). Plots without fungicide were sprayed with water.  
110 Difenoconazole interrupts the synthesis of ergosterol (IUPAC 2016), a fungal cell membrane  
111 component. If applied on top of the vegetation, it has no effect on soil (Dahmen, Staub 1992).  
112 Azoxistrobin blocks the cell respiration by inhibiting the proenzyme coenzyme Q which prevents the  
113 production of ATP. Studies have shown no phytotoxic effects of azoxistrobin (Sundravadana *et al.* 2007;  
114 Khalko *et al.* 2009) or difenoconazole (Nithyameenakshi *et al.* 2006). To account for potential soil  
115 heterogeneity across the study site, plots were arranged in four blocks. Each community composition  
116 was grown once per block and the nitrogen and fungicide treatments were assigned randomly to the  
117 communities in the blocks.

## 118 Measurements

119 We measured plant aboveground **biomass** by harvesting two subplots of 0.1m<sup>2</sup>, 5cm above ground level,  
120 in mid-June and at the beginning of August 2018. Biomass was dried and weighed. Percentage cover of  
121 all sown plant species, plus weeds and bare ground, was visually estimated in the central square meter  
122 of the plots shortly before the biomass harvest (June and August). The sum of all estimates per plot could  
123 exceed 100% but here we analyse proportional abundances of each species. **Total plant cover** was  
124 calculated as 1- the proportion of bare ground. To describe the functional composition of the  
125 communities, we measured SLA (Garnier *et al.* 2001) on one leaf each from five plants, growing in the  
126 central square meter of all the monoculture plots (if possible, otherwise elsewhere in the plot) in June  
127 and in August, at the same time as we measured percentage cover. We then calculated several measures  
128 of plant functional composition. We calculated **the realized SLA**, i.e. the community weighted mean  
129 SLA per plot, using the percentage cover measurements and the mean SLA per monoculture as the  
130 baseline SLA for each species under a given treatment (the four combinations of nitrogen x fungicide).  
131 Because plant community composition can shift in abundance in response to the nitrogen and fungicide  
132 treatments, we also calculated the **shift in SLA** of the whole plant community relative to the **sown SLA**

133 (mean SLA of all species sown in a community), by subtracting the sown SLA from the realized SLA  
134 (see also Supplementary Methods).

135 Overall **fungal infection**, and infection with rusts, smuts, powdery mildews, downy mildews and leaf  
136 spots (see Rottstock *et al.* (2014), was assessed for each plant species in each plot, in July and in early  
137 October 2018. Ten randomly chosen individuals per plant species, growing in the central square meter  
138 of the plot (if possible, otherwise elsewhere in the plot), were screened for signs of infection and the  
139 percentage of infected individuals was recorded (see also Supplementary Methods). If there were less  
140 than 10 individuals in total, the percentage of infected individuals was calculated based on the observed  
141 number of individuals. Based on the species level infection, and the percentage cover of each plant  
142 species, we calculated an abundance weighted mean fungal infection per plot and season for total  
143 infection and infection by separate fungal groups (rusts, powdery and downy mildews and leaf spots).  
144 The smut fungi were excluded, because they were very rare (observed only eight times).

145 Further, we measured the **microclimate** (temperature and relative humidity logger iButton DS1923-F5,  
146 Maxim Integrated, USA) in each plot, in the center of one of the biomass subplots for a period of 2-3  
147 days, with hourly measurements between 16.07.2018 and 13.08.2018. Due to a lack of data loggers we  
148 could only measure 28 plots at the same time (Table S3). Therefore, to account for differences in daily  
149 temperatures we subtracted the temperature and humidity measured in the plots from temperature and  
150 humidity measured at the same time in a nearby meteorological station in Zollikhofen (3.81 km away,  
151 MeteoSchweiz 2019).

## 152 **Analysis**

153 Biomass, infection and trait data correlated well between the two time points when they were measured.  
154 For this reason, we used the total biomass (sum of the two harvests) and mean values of community shift  
155 SLA and fungal infection between the two time points.

156 We conducted two analyses to test for the causes and consequences of pathogen infection. We first  
157 analyzed the overall effects of fungicide on fungal infection and biomass production at the plot level,  
158 using linear mixed effect models, with fungicide as the independent variable and nitrogen addition, sown



159 species diversity and realized SLA and all possible interactions as covariates. Block and species  
160 combination (84 levels) were included as random effects. We stepwise excluded non-significant terms  
161 from the model based on likelihood-ratio tests (Zuur 2009) . We also ran separate models for each fungal  
162 group.

163 Secondly, we tested drivers and effects of quantitative levels of fungal pathogen infection in structural  
164 equation models (SEM, Figure S1, Table S1). As fungicide did not completely remove infection we  
165 fitted a multi-group SEM to test the drivers and effects of pathogen infection on control and fungicide  
166 plots separately (Grace 2006). All other treatment variables were also included in the SEM with direct  
167 effects on both fungal infection and biomass production. In the SEM we were therefore able to test for  
168 the effect of quantitative levels of pathogen infection and whether it varied with fungicide application.  
169 We included the deviation between plot and air humidity and temperature and plant cover, to account  
170 for indirect effects of the treatment variables through changes in microclimate. This considers potential  
171 impacts of the plant community on fungal infection, which otherwise would have likely influenced the  
172 path between fungal infection and biomass. We also incorporated an interaction between diversity and  
173 pathogen infection, which could affect plot biomass production, by constructing a dummy variable by  
174 multiplying the standardized values of fungal infection and species diversity (path 14 in Figure S1, Table  
175 S1).

176 We fitted a multi-group SEM, with the groups being the two levels of fungicide treatment, which allowed  
177 fungicide to interact with all the paths of the models. We checked whether each path and intercept  
178 differed significantly with fungicide, by comparing the AIC values of a fully unconstrained model,  
179 where all paths and intercepts were allowed to differ, with a model where a particular path was  
180 constrained to be equal between fungicide treatments. All paths that did not differ significantly were  
181 kept constrained (Table S2). We used the same SEM to analyze the separate fungal groups (rusts,  
182 powdery mildews, downy mildews and leaf spots).

183 To test for diversity effects through host dilution, we calculated host concentration effects for each plant  
184 species, as the relationship between host cover and infection. We fitted separate linear mixed effect  
185 models per plant species, nitrogen and fungicide treatment with block as a random effect. The slopes of

186 these models were analyzed using another mixed effect model with nitrogen and fungicide as  
187 explanatory variables and species as a random effect. This allowed us to test whether nitrogen  
188 enrichment and fungicide alter any host dilution effects. All analyses were conducted in R (R Core Team  
189 2018), using the package lme4 for linear mixed effects models (Bates *et al.* 2015) and lavaan for SEMs  
190 (Rosseel 2012).

## 191 RESULTS

### 192 Effects of fungicide application on fungal infection and plant biomass

193 Fungicide reduced fungal infection by 25.33% on average (Figure 2a). The fungicide was most effective  
194 in high SLA communities, especially at high species diversity and in the absence of nitrogen fertilization  
195 (Figure S4). Fungicide also increased plant biomass but only in plots with high SLA (Figure 2b). This  
196 agrees with the idea that fungicide was most effective in fast growing communities. Comparing the  
197 intercepts in the SEM between fungicide and non-fungicide plots showed similar results (Figure 4h).

### 198 Drivers of infection

199 We then used SEM to look in more detail at the drivers of pathogen infection and its impacts on biomass  
200 (SEM: Figure 3; selected partial plots: Figure 4; path coefficients, significances, etc.: Table S8). The  
201 most important driver was functional composition, i.e. whether plant communities contained slow or  
202 fast growing plants. Both the sown SLA (Figure 4a) and the shift in SLA (Figure 4b) increased fungal  
203 infection. Communities with low sown SLA and a highly negative SLA shift, had lower infection than  
204 high SLA communities. Leaf spots, rusts and to some degree powdery mildews increased with increasing  
205 SLA, whereas downy mildews were unaffected (Figure S6).

206 Microclimate was also important and an increase in temperature increased fungal infection (Figure 4f).  
207 Humidity had no significant effect on fungal infection (Figure 4e). However, humidity and temperature  
208 were negatively correlated (Figure 3), which makes it hard to fully separate their effects. The impact of  
209 microclimate varied between fungal groups: rusts and leaf spots, the most abundant groups, increased  
210 with increasing temperature, while powdery and downy mildews were unaffected (Figure S6). Nitrogen  
211 and plant species diversity did not affect fungal infection directly (Figure 4c-d).

212 Several factors indirectly affected infection via changing microclimate. Temperature varied by 13.6°C  
213 between plots and was reduced by plant cover, but not by biomass. Plant cover was increased by plant  
214 diversity and nitrogen but reduced by sown SLA. Therefore, in addition to its positive direct effect, sown  
215 SLA also had a positive indirect effect on fungal infection, but this indirect path was non-significant  
216 overall. Species diversity and nitrogen enrichment indirectly decreased infection by increasing plant  
217 cover and reducing temperature, but again the indirect effects were not significant overall.

218 The absence of a direct diversity effect on fungal infection cannot be explained by an absence of host  
219 concentration effects, as on average plant species cover was positively related to species-specific  
220 infection, suggesting additional mechanisms such as spillover or additionally the presence of density  
221 independent pathogens. The application of fungicide removed host concentration effects (Figure S7).

## 222 Impact of fungal infection

223 In the SEM (SEM: Figure 3; selected partial plots: Figure 4; path coefficients, significances, etc.: Table  
224 S8), fungal infection also affected plant biomass production, however this depended on plant diversity  
225 (Figure 4i): in species rich communities fungal infection was negatively related to plant biomass,  
226 indicating that fungi had strong impacts on biomass, whereas in monocultures, fungal infection was even  
227 weakly positively related to biomass (Figure 4i). Adding fungicide increased the effect of diversity on  
228 the disease-productivity relationship, which means a stronger negative correlation at high diversity and  
229 a stronger positive correlation between infection and biomass in monocultures (Figure 4i). The SEMs  
230 per fungal group revealed that the leaf spots and to some degree the rusts drove the negative relationship  
231 between infection and biomass (Figure S6). Powdery mildew had no impact on biomass production,  
232 while the downy mildews even increased biomass. The downy mildew and rust models did not fit well  
233 (both  $p < 0.001$ ) but the fit was good for the leaf spots ( $p = 0.268$ ) and adequate for the powdery mildews  
234 ( $p = 0.088$ ).

235 Biomass was also affected by several other factors. Nitrogen enrichment increased biomass production  
236 independently of the fungicide treatment, a shift in SLA towards faster growing species increased  
237 biomass production, while the effects of sown SLA on biomass depended on the fungicide treatment.

238 Fungicide also altered the SLA shift in the experimental plant communities to favor faster growing  
239 species (Figure 4j), but there was a lot of unexplained variation in SLA shift ( $R^2=0.084$  under fungicide  
240 and  $R^2=0.031$  under no fungicide treatment). The effect of fungicide on the SLA shift was amplified by  
241 nitrogen enrichment so that plots with nitrogen added and pathogens reduced shifted towards dominance  
242 by faster growing species (Figure 4j).

## 243 DISCUSSION

### 244 Growth-defense trade-off

245 We found strong support for the growth-defense trade-off hypothesis as the key driver of pathogen  
246 abundance and impact. Plant communities dominated by fast growing species had increased infection,  
247 and fungicide was most effective at reducing fungal infection in high SLA communities. There is an  
248 inherent trade-off between plant growth and the production of certain defense compounds (Huot *et al.*  
249 2014), and species which are at the fast end of the leaf economics spectrum have been shown to have  
250 lower structural and chemical defenses (Mason *et al.* 2016; Coley 1988) and higher tissue nutrient levels  
251 (Wright *et al.* 2004). Both could explain the increased pathogen attack on fast growing species, however,  
252 the absence of support for the nitrogen disease hypothesis, see below, may indicate that changes in  
253 defenses are more important. Our results show that growth-defense trade-offs are not only a major  
254 predictor of herbivory (e.g. Lind *et al.*) and pathogen attack on individual plant species but also scale up  
255 to be the key driver of community level pathogen infection.

256 Fungal pathogen impact was also mostly determined by growth-defense trade-offs. Fungicide allowed  
257 fast growing species to increase in abundance, especially under nitrogen. This is in line with findings  
258 that plants originating from nutrient rich habitats benefitted most from enemy release (Blumenthal *et al.*  
259 2009, but see e.g. Heckman *et al.* 2017). Fast growing species are expected to be good competitors in  
260 nutrient rich environments (Wright *et al.* 2004; Poorter *et al.* 2009), but our results suggest that  
261 pathogens reduce their competitive advantage. Pathogens may therefore equalize competitive abilities  
262 and promote diversity in nitrogen rich conditions. In nutrient poor habitats, slow growing plants are  
263 expected to be more competitive and in such an environment, pathogens might reduce diversity by

264 excluding faster growing species. Previous studies have shown pathogens can alter the outcome of plant  
265 competition (Paul 1989; Ridenour & Callaway 2003) and change plant community composition (Allan  
266 et al. 2010). Our results suggest that the growth strategy of plants is the key predictor of plant community  
267 responses to pathogens, and that pathogens promote slow growing species. Over time, this would be  
268 expected to reduce pathogen abundance and therefore impact. Such feedbacks could cause temporal  
269 dynamics between plant community composition and fungal infection, which could only be tested with  
270 long term data on fungal infection and plant functional composition.

## 271 **Nitrogen disease**

272 We did not find support for the nitrogen disease hypothesis. Nitrogen can increase disease in crops but  
273 findings from grasslands are contradictory, with some studies finding support (Mitchell *et al.* 2003), but  
274 others not (Lau *et al.* 2008). Compared to agricultural systems, grassland plants could evolve increased  
275 disease resistance with nitrogen fertilization (Snaydon & Davies 1972), which might offset any benefits  
276 the pathogens would derive from higher plant nutrient contents. In addition, plant community  
277 composition changes with nitrogen enrichment. Mitchell *et al.* (2003) did not control for changes in  
278 composition but showed that the "disease proneness" of the plants was an important driver of infection.  
279 Liu *et al.* (2018) showed that nitrogen addition favors disease prone species (but see Welsh *et al.* 2016).  
280 However, these studies did not explain what drives disease resistance and could not separate  
281 compositional change effects from direct effects of nitrogen. Our results indicate that trade-offs linked  
282 to the leaf-economics spectrum are likely the underlying mechanism and that an increase in fast growing  
283 species is responsible for an increase in infection with nitrogen. Further, nitrogen enrichment can  
284 increase humidity and decrease temperature through increased shading in denser vegetation. In the dry  
285 summer of 2018, N fertilisation may have decreased water and temperature stress and made the plants  
286 more resistant to fungal infection, which would explain why we found a negative indirect effect of  
287 nitrogen enrichment on infection. This all suggests that the direct effect of nitrogen on community  
288 infection in grasslands is weak to non-existent. Nitrogen enrichment rather drives infection through  
289 indirect effects of community shift and changes in microclimatic conditions.

## 290 Impact of plant diversity

291 Plant diversity did not affect fungal infection in our study, apart from a small indirect effect through  
292 microclimate. This is contrary to most other studies, which found that an increase in diversity leads to a  
293 decrease in infection (e.g. Mitchell *et al.* 2002; Liu *et al.* 2016; Rottstock *et al.* 2014; but see Halliday  
294 *et al.* 2017). We expected that host abundance would be diluted at high plant diversity and that this  
295 would reduce infection. However, while infection on individual plant species was lower when the plants  
296 were rarer (at least when pathogens were not suppressed by fungicide), this did not lead to a negative  
297 diversity-infection relationship for the community. Other diversity related mechanisms may have  
298 counteracted this relationship. Several other studies reported unexplained effects of diversity on fungal  
299 infection, in addition to host dilution, and different plant species and diseases varied in their response to  
300 diversity (Rottstock *et al.* 2014; Mitchell *et al.* 2002; Knops *et al.* 1999). One mechanism by which  
301 diversity can counteract dilution effects is increased spillover of generalist pathogens at high diversity  
302 or an increase of density independent pathogens such as vector-transmitted ones (Power & Mitchell  
303 2004; Halliday *et al.* 2017). Another possibility is that diverse communities become dominated by  
304 susceptible species, limiting host dilution effects. Both mechanisms might explain why plant diversity  
305 did not affect fungal infection in our study.

306 Interestingly, our results suggest that the impact of fungal pathogens on biomass production was higher  
307 in species rich plant communities. Even though plant diversity did not alter overall pathogen infection,  
308 it could still have altered fungal community composition or diversity and might have led to more  
309 aggressive fungi at high plant diversity or reduced pathogen tolerance of the plants. However, we did  
310 not find that diversity altered the abundance of our four fungal guilds. It is therefore also possible that  
311 the ability of the plants to deal with infection varies with diversity. A higher pathogen pressure in species  
312 poor communities might select for better defended plant genotypes, leading over time to reduced  
313 pathogen impact in monocultures. Results from the Jena Experiment support this idea and show that  
314 plants in monocultures have evolved to be more resistant against belowground pathogens (Zuppinger-  
315 Dingley *et al.*) and aboveground fungi (Hahl *et al.* 2017). To better predict variation in pathogen impact  
316 in plant communities we may need to consider pathogen community composition and host genetics.

## 317 Climatic stress

318 Temperature also affected fungal infection - leaf spots and rusts both benefitted from an increase in  
319 temperature in the vegetation. Other studies also indicate that higher temperatures increase pathogen  
320 infection (Liu *et al.* 2016) and that different fungal groups vary in their responses. Powdery mildews  
321 can increase with temperature, while rusts show more variables responses (Gullino *et al.* 2018; Helfer  
322 2014). Longer periods of 100% humidity lead to water condensation, which has been shown to increase  
323 infection (Burdon 1991; Sun *et al.* 2017). However, we found no effect of humidity on infection, after  
324 correcting for temperature. The summer 2018 was extraordinarily hot and dry, with mean July  
325 temperatures 1.6°C above the average of the last 30 years and precipitation 18.81% lower  
326 (MeteoSchweiz 2019), which likely resulted in intensive drought and heat stress for the plants. Drought  
327 stress can increase fungal diseases in trees (Desprez-Loustau *et al.* 2006) and increase the negative  
328 effects of pathogens on competitive ability (Paul & Ayres 1987). The microclimate itself was driven by  
329 plant cover, which was determined by plant diversity, nitrogen and functional composition. These  
330 variables indirectly (but weakly) influenced fungal infection through a change in the microclimate.  
331 Changes in vegetation microclimate may therefore play an important role in affecting plant community  
332 resistance to disease under extreme weather conditions.

## 333 Impact of fungicide and infection intensity on plant biomass

334 In our study we used two approaches to assess the impact of fungal pathogens: exclusion with fungicide  
335 and SEMs testing the effect of infection intensity on plant biomass production. Fungicide application  
336 increased plant biomass but only in plots dominated by fast growing plants, which suggests that fast  
337 growing plants are not entirely tolerant. The magnitude of biomass reduction was lower than in other  
338 studies (Allan *et al.* 2010; Seabloom *et al.* 2017), perhaps because, unlike in the other studies, we mowed  
339 the field regularly, preventing the build-up of large pathogen populations over the season. Our analysis  
340 relating infection and biomass suggested that the negative impact of fungal infection on biomass in high  
341 diversity plots was amplified by fungicide, even though fungicide generally decreased infection.  
342 Fungicide shifted the functional composition of the fungal community by mainly removing the rather  
343 specialized rusts and powdery mildews (Klenke 2015) and it removed host concentration effects, which

344 also suggests a shift from specialists towards more generalist pathogens (Bever *et al.* 2015). Fungicide  
345 may therefore have selected for more aggressive, generalist pathogens, which would also explain its  
346 small overall effect on biomass production. These results suggest that a shift in pathogen community  
347 composition could be a major driver of pathogen impact. Many studies assess the impact of fungal  
348 infection on ecosystem functioning by comparing plant biomass in fungicide and non-fungicide plots  
349 (Mitchell 2003; Allan *et al.* 2010; Seabloom *et al.* 2017; Heckman *et al.* 2017). Our results show the  
350 importance of complementing these experiments with measures of infection severity and pathogen  
351 community composition. To increase our mechanistic understanding of the role of pathogens in affecting  
352 ecosystem functioning it is crucial to combine both approaches.

353 One alternative explanation for the altered impact of fungal infection on biomass under fungicide  
354 treatment might be non-target effects of the fungicide. However, studies show that the fungicides used  
355 here do not have phytotoxic effects when they are used in the recommended concentrations  
356 (Sundravadana *et al.* 2007; Khalko *et al.* 2009; Nithyameenakshi *et al.* 2006). Fungicides might also  
357 reduce beneficial fungi, like mycorrhiza belowground, or other mutualistic leaf-endophytes (Fokkema  
358 & Nooij 1981; Henriksen & Elen 2005). However, root samples of a subset of the experimental plant  
359 species showed no difference in mycorrhizal colonization between plants from fungicide and non-  
360 fungicide plots in 2017 (data not shown) and a loss of mutualists would be expected to reduce biomass  
361 production with fungicide application. This suggests that while non-target effects cannot completely be  
362 excluded, they are unlikely to be the key driver of our results.

## 363 Conclusions

364 We found strong support for growth-defense trade-off as a main driver of fungal infection. Fungal  
365 infection had an impact on biomass production, but this impact was context dependent, with greatest  
366 biomass loss due to pathogens in species rich communities receiving fungicide treatment. Fungicide  
367 altered the complex plant-pathogen interactions, beyond just removing pathogens, probably by removing  
368 certain fungi more efficiently than others. Fungicide may therefore have a wider range of effects in  
369 ecosystems than previously considered. This is both a challenge and an opportunity for studies using  
370 fungicide treatments.



## AUTHORS' CONTRIBUTIONS

SC, NP and EA designed and set up the PaNDiv experiment. NP and SC collected the data. SC analyzed the data and wrote the manuscript with substantial input from EA, NP and AK.

## ACKNOWLEDGEMENTS

We thank Hugo Vincent and the whole PaNDiv team and helpers, without whom maintaining such a large experiment would not have been possible. Thanks to Nadia Maroufi and Tosca Manall for their feedback on the manuscript and to Fletcher Halliday for the friendly review. This study was supported by funding of the Swiss National Science Foundation.

## REFERENCES

- Allan, E., van Ruijven, J. & Crawley, M.J. (2010). Foliar fungal pathogens and grassland biodiversity. *Ecology*, 91, 2572–2582.
- Bachmann, D., Roscher, C. & Buchmann, N. (2018). How do leaf trait values change spatially and temporally with light availability in a grassland diversity experiment? *Oikos*, 127, 935–948.
- Barrett, L.G., Kniskern, J.M., Bodenhausen, N., Zhang, W. & Bergelson, J. (2009). Continua of specificity and virulence in plant host-pathogen interactions: causes and consequences. *New Phytol.*, 183, 513–529.
- Bates, D., Mächler, M., Bolker, B. & Walker, S. (2015). Fitting Linear Mixed-Effects Models Using lme4. *J. Stat. Softw.*, 67, 1–48.
- Bever, J.D., Mangan, S.A. & Alexander, H.M. (2015). Maintenance of Plant Species Diversity by Pathogens. *Annu. Rev. Ecol. Evol. Syst.*, 46, 305–325.
- Bluethgen, N., Dormann, C.F., Prati, D., Klaus, V.H., Kleinebecker, T. & Hoelzel, N. *et al.* (2012). A quantitative index of land-use intensity in grasslands: Integrating mowing, grazing and fertilization. *Basic Appl. Ecol.*, 13, 207–220.
- Blumenthal, D., Mitchell, C.E., Pysek, P. & Jarosik, V. (2009). Synergy between pathogen release and resource availability in plant invasion. *Proc. Natl. Acad. Sci. U. S. A.*, 106, 7899–7904.

- Bobbink, R., Hicks, K., Galloway, J., Spranger, T., Alkemade, R. & Ashmore, M. *et al.* (2010). Global assessment of nitrogen deposition effects on terrestrial plant diversity: a synthesis. *Ecol. Appl.*, 20, 30–59.
- Borer, E.T., Lind, E.M., Ogdahl, E.J., Seabloom, E.W., Tilman, D. & Montgomery, R.A. *et al.* (2015). Food-web composition and plant diversity control foliar nutrient content and stoichiometry. *J. Ecol.*, 103, 1432–1441.
- Bradley, D.J., Gilbert, G.S. & Im Parker (2003). Susceptibility of clover species to fungal infection: The interaction of leaf surface traits and environment. *Am. J. Bot.*, 90, 857–864.
- Bregaglio, S., Donatelli, M. & Confalonieri, R. (2013). Fungal infections of rice, wheat, and grape in Europe in 2030–2050. *Agron. Sustain. Dev.*, 33, 767–776.
- Burdon, J.J. (1991). Fungal Pathogens as Selective Forces in Plant Populations and Communities. *Austral Ecol.*, 16, 423–432.
- Burdon, J.J., Thrall, P.H. & Ericson, L. (2006). The current and future dynamics of disease in plant communities. *Annu. Rev. Phytopathol.*, 44, 19–39.
- Chen, W., Wellings, C., Chen, X., Kang, Z. & Liu, T. (2014). Wheat stripe (yellow) rust caused by *Puccinia striiformis* f. sp. *tritici*. *Mol. Plant Pathol.*, 15, 433–446.
- Civitello, D.J., Cohen, J., Fatima, H., Halstead, N.T., Liriano, J. & McMahon, T.A. *et al.* (2015). Biodiversity inhibits parasites: Broad evidence for the dilution effect. *Proc. Natl. Acad. Sci. U. S. A.*, 112, 8667–8671.
- Coley, P.D. (1988). Effects of plant growth rate and leaf lifetime on the amount and type of anti-herbivore defense. *Oecologia*, 74, 531–536.
- Cronin, J.P., Rúa, M.A. & Mitchell, C.E. (2014). Why Is Living Fast Dangerous? Disentangling the Roles of Resistance and Tolerance of Disease. *Am. Nat.*, 184, 172–187.
- Cronin, J.P., Welsh, M.E., Dekkers, M.G., Abercrombie, S.T. & Mitchell, C.E. (2010). Host physiological phenotype explains pathogen reservoir potential. *Ecol. Lett.*, 13, 1221–1232.
- De Schrijver, A., Frenne, P. de, Ampoorter, E., van Nevel, L., Demey, A. & Wuyts, K. *et al.* (2011). Cumulative nitrogen input drives species loss in terrestrial ecosystems. *Glob. Ecol. Biogeogr.*, 20, 803–816.

- De Vries, F.T., Manning, P., Tallowin, J.R.B., Mortimer, S.R., Pilgrim, E.S. & Harrison, K.A. *et al.* (2012). Abiotic drivers and plant traits explain landscape-scale patterns in soil microbial communities. *Ecol. Lett.*, 15, 1230–1239.
- Delarze, R. (2015). *Lebensräume der Schweiz. Ökologie - Gefährdung - Kennarten*. 3rd edn. Bern : Ott.
- Desprez-Loustau, M.-L., Marçais, B., Nageleisen, L.-M., Piou, D. & Vannini, A. (2006). Interactive effects of drought and pathogens in forest trees. *Ann. For. Sci.*, 63, 597–612.
- DiTommaso, A. & Aarssen, L.W. (1989). Resource manipulations in natural vegetation: a. *VEGETATIO*, 84, 9–29.
- Dordas, C. (2008). Role of nutrients in controlling plant diseases in sustainable agriculture. A review. *Agron. Sustain. Dev.*, 28, 33–46.
- Endara, M.-J. & Coley, P.D. (2011). The resource availability hypothesis revisited: a meta-analysis. *Funct. Ecol.*, 25, 389–398.
- Fay, P.A., Prober, S.M., Harpole, W.S., Knops, J.M.H., Bakker, J.D. & Borer, E.T. *et al.* (2015). Grassland productivity limited by multiple nutrients. *Nat. Plants*, 1.
- Fisher, M.C., Henk, D.A., Briggs, C.J., Brownstein, J.S., Madoff, L.C. & McCraw, S.L. *et al.* (2012). Emerging fungal threats to animal, plant and ecosystem health. *Nature*, 484, 186–194.
- Fokkema, N.J. & Nooij, M.P. de (1981). The Effect of Fungicides on the Microbial Balance in the Phyllosphere1. *EPPO Bulletin*, 11, 303–310.
- Fox, J. (2003). Effect Displays in R for Generalised Linear Models. *J. Stat. Softw.*, 8.
- Garnier, E., Shipley, B., Roumet, C. & Laurent, G. (2001). A standardized protocol for the determination of specific leaf area and leaf dry matter content. *Funct. Ecol.*, 15, 688–695.
- Gianoli, E. & Salgado-Luarte, C. (2017). Tolerance to herbivory and the resource availability hypothesis. *Biology letters*, 13.
- Grace, J.B. (2006). *Structural equation modeling and natural systems*. Cambridge University Press, Cambridge.
- Gullino, M.L., Pugliese, M., Gilardi, G. & Garibaldi, A. (2018). Effect of increased CO<sub>2</sub> and temperature on plant diseases: a critical appraisal of results obtained in studies carried out under controlled environment facilities. *J. Plant Pathol.*, 100, 371–389.

- Hahl, T., van Moorsel, S.J., Schmid, M.W., Zuppinger-Dingley, D., Schmid, B. & Wagg, C. (2017). *Diversity loss selects for altered plant phenotypic responses to local arbuscular mycorrhizal communities.*
- Halliday, F.W., Heckman, R.W., Wilfahrt, P.A. & Mitchell, C.E. (2017). A multivariate test of disease risk reveals conditions leading to disease amplification. *Proc. R. Soc. Lond., B, Biol. Sci.*, 284.
- Halliday, F.W., Heckman, R.W., Wilfahrt, P.A. & Mitchell, C.E. (2019). Past is prologue: host community assembly and the risk of infectious disease over time. *Ecol. Lett.*, 22, 138–148.
- Hautier, Y., Seabloom, E.W., Borer, E.T., Adler, P.B., Harpole, W.S. & Hillebrand, H. *et al.* (2014). Eutrophication weakens stabilizing effects of diversity in natural grasslands. *Nature*, 508, 521.
- Heckman, R.W., Halliday, F.W., Wilfahrt, P.A. & Mitchell, C.E. (2017). Effects of native diversity, soil nutrients, and natural enemies on exotic invasion in experimental plant communities. *Ecology*, 98, 1409–1418.
- Helfer, S. (2014). Rust fungi and global change. *New Phytol.*, 201, 770–780.
- Henriksen, B. & Elen, O. (2005). Natural Fusarium grain infection level in wheat, barley and oat after early application of fungicides and herbicides. *JOURNAL OF PHYTOPATHOLOGY*, 153, 214–220.
- Huot, B., Yao, J., Montgomery, B.L. & He, S.Y. (2014). Growth-Defense Tradeoffs in Plants: A Balancing Act to Optimize Fitness. *Mol. Plant*, 7, 1267–1287.
- Isbell, F., Reich, P.B., Tilman, D., Hobbie, S.E., Polasky, S. & Binder, S. (2013). Nutrient enrichment, biodiversity loss, and consequent declines in ecosystem productivity. *Proc. Natl. Acad. Sci. U. S. A.*, 110, 11911–11916.
- IUPAC (2016). Pesticide Properties Database. difenoconazole. [WWW document]. URL <http://sitem.herts.ac.uk/aeru/iupac/Reports/230.htm#none>.
- Karlsson, I., Friberg, H., Steinberg, C. & Persson, P. (2014). Fungicide Effects on Fungal Community Composition in the Wheat Phyllosphere. *PLoS One*, 9.
- Keesing, F., Holt, R.D. & Ostfeld, R.S. (2006). Effects of species diversity on disease risk. *Ecol. Lett.*, 9, 485–498.
- Khalko, S., Pan, S.K. & others (2009). Phytotoxicity of some fungicides and their compatibility study with a potential biocontrol agent *Trichoderma harzianum*. *Journal of Crop and Weed*, 5, 151–153.

- Klenke, F. (2015). *Pflanzenparasitische Kleinpilze. Bestimmungsbuch für Brand-, Rost-, Mehltau-, Flagellatenpilze und Wucherlingsverwandte in Deutschland, Österreich, der Schweiz und Südtirol*. Springer Berlin Heidelberg, Berlin, Heidelberg.
- Knops, J.M.H., Tilman, D., Haddad, N.M., Naeem, S., Mitchell, C.E. & Haarstad, J. *et al.* (1999). Effects of plant species richness on invasion dynamics, disease outbreaks, insect abundances and diversity. *Ecol. Lett.*, 2, 286–293.
- Laine, A.-L. (2006). Evolution of host resistance: looking for coevolutionary hotspots at small spatial scales. *Proc. R. Soc. Lond., B, Biol. Sci.*, 273, 267–273.
- Lau, J.A., Strengbom, J., Stone, L.R., Reich, P.B. & Tiffin, P. (2008). Direct and indirect effects of CO<sub>2</sub>, nitrogen, and community diversity on plant-enemy interactions. *Ecology*, 89, 226–236.
- Lavorel, S. & Grigulis, K. (2012). How fundamental plant functional trait relationships scale-up to trade-offs and synergies in ecosystem services. *J. Ecol.*, 100, 128–140.
- Leggett, H.C., Buckling, A., Long, G.H. & Boots, M. (2013). Generalism and the evolution of parasite virulence. *Trends Ecol. Evol.*, 28, 592–596.
- Lind, E.M., Borer, E., Seabloom, E., Adler, P., Bakker, J.D. & Blumenthal, D.M. *et al.* (2013). Life-history constraints in grassland plant species: a growth-defence trade-off is the norm. *Ecol. Lett.*, 16, 513–521.
- Liu, X., Chen, F., Lyu, S., Sun, D. & Zhou, S. (2018). Random species loss underestimates dilution effects of host diversity on foliar fungal diseases under fertilization. *Ecol. Evol. (Ecology and Evolution)*, n/a-n/a.
- Liu, X., Lyu, S., Sun, D., Bradshaw, C.J.A. & Zhou, S. (2017). Species decline under nitrogen fertilization increases community-level competence of fungal diseases. *Proc. R. Soc. Lond., B, Biol. Sci.*, 284.
- Liu, X., Lyu, S., Zhou, S. & Bradshaw, C.J.A. (2016). Warming and fertilization alter the dilution effect of host diversity on disease severity. *Ecology*, 97, 1680–1689.
- Mason, C.M., Bowsher, A.W., Crowell, B.L., Celay, R.M., Tsai, C.-J. & Donovan, L.A. (2016). Macroevolution of leaf defenses and secondary metabolites across the genus *Helianthus*. *New Phytol.*, 209, 1720–1733.

- MeteoSchweiz (2019). MeteoSwiss IDAWEB. [WWW document]. URL <https://gate.meteoswiss.ch/idaweb/login.do>.
- Mitchell, C.E. (2003). Trophic control of grassland production and biomass by pathogens. *Ecol. Lett.*, 6, 147–155.
- Mitchell, C.E., Reich, P.B., Tilman, D. & Groth, J.V. (2003). Effects of elevated CO<sub>2</sub>, nitrogen deposition, and decreased species diversity on foliar fungal plant disease. *Glob. Change Biol.*, 9, 438–451.
- Mitchell, C.E., Tilman, D. & Groth, J.V. (2002). Effects of grassland plant species diversity, abundance, and composition on foliar fungal disease. *Ecology*, 83, 1713–1726.
- Nithyameenakshi, S., Jeyaramraja, P.R. & Manian, S. (2006). Investigations on Phytotoxicity of Two New Fungicides, Azoxystrobin and Difenoconazole. *American J. of Plant Physiology*, 1, 89–98.
- Parker, I.M., Saunders, M., Bontrager, M., Weitz, A.P., Hendricks, R. & Magarey, R. *et al.* (2015). Phylogenetic structure and host abundance drive disease pressure in communities. *Nature*, 520, 542.
- Paul, N.D. (1989). The Effects of Puccinia Lagenophorae on Senecio Vulgaris in Competition With Euphorbia Peplus. *J. Ecol.*, 77, 552–564.
- Paul, N.D. & Ayres, P.G. (1987). Water Stress Modifies Intraspecific Interference between Rust (Puccinia lagenophorae Cooke)-Infected and Healthy Groundsel (Senecio vulgaris L.). *New Phytol.*, 106, 555–566.
- Paul, N.D., Ayres, P.G. & Wyness, L.E. (1989). On the use of fungicides for experimentation in natural vegetation. *Funct. Ecol.*, 3, 759–769.
- Peters, J.C. & Shaw, M.W. (1996). Effect of artificial exclusion and augmentation of fungal plant pathogens on a regenerating grassland. *New Phytol.*, 134, 295–307.
- Pichon, N.A., Cappelli, S., Soliveres, S., Hölzel, N., Klaus, V.H. & Kleinebecker, T. *et al.* (2019). Decomposition disentangled: a test of the multiple mechanisms by which nitrogen enrichment alters litter decomposition. *in review*.
- Poorter, H., Niinemets, Ü., Poorter, L., Wright, I.J. & Villar, R. (2009). Causes and consequences of variation in leaf mass per area (LMA): a meta-analysis. *New Phytol.*, 182, 565–588.
- Power, A.G. & Mitchell, C.E. (2004). Pathogen spillover in disease epidemics. *Am. Nat.*, 164, S79-S89.

- Procházka, J., Brom, J., Št'astný, J. & Pecharová, E. (2011). The impact of vegetation cover on temperature and humidity properties in the reclaimed area of a brown coal dump. *Int. J. Min. Reclam. Environ.*, 25, 350–366.
- R Core Team (2018). *R: A Language and Environment for Statistical Computing*, Vienna, Austria.
- Reich, P.B. & Cornelissen, H. (2014). The world-wide ‘fast-slow’ plant economics spectrum. A traits manifesto. *J. Ecol.*, 102, 275–301.
- Reich, P.B., Walters, M.B. & Ellsworth, D.S. (1992). Leaf Life-Span in Relation to Leaf, Plant, and Stand Characteristics among Diverse Ecosystems. *Ecol. Monograph*, 62, 365–392.
- Ridenour, W.L. & Callaway, R.M. (2003). Root herbivores, pathogenic fungi, and competition between *Centaurea maculosa* and *Festuca idahoensis*. *Plant Ecol.*, 169, 161–170.
- Robinson, P.W. & Hodges, C.F. (1981). Nitrogen-Induced Changes in the Sugars and Amino Acids of Sequentially Senescing Leaves of *Poa pratensis* and Pathogenesis by *Drechslera sorokiniana*1). *JOURNAL OF PHYTOPATHOLOGY*, 101, 348–361.
- Roscher, C., Schumacher, J., Foitzik, O. & Schulze, E.-D. (2007). Resistance to rust fungi in *Lolium perenne* depends on within-species variation and performance of the host species in grasslands of different plant diversity. *Oecologia*, 153, 173–183.
- Rosseel, Y. (2012). lavaan: An R Package for Structural Equation Modeling. *J. Stat. Softw.*, 48, 1–36.
- Rottstock, T., Joshi, J., Kummer, V. & Fischer, M. (2014). Higher plant diversity promotes higher diversity of fungal pathogens, while it decreases pathogen infection per plant. *Ecology*, 95, 1907–1917.
- Roy, B.A., Güsewell, S. & Harte, J. (2004). Response of plant pathogens and herbivores to a warming experiment. *Ecology*, 85, 2570–2581.
- Roy, B.A., Kirchner, J.W., Christian, C.E. & Rose, L.E. (2000). High disease incidence and apparent disease tolerance in a North American Great Basin plant community. *Evol. Ecol.*, 14, 421.
- Seabloom, E.W., Kinkel, L., Borer, E.T., Hautier, Y., Montgomery, R.A. & Tilman, D. (2017). Food webs obscure the strength of plant diversity effects on primary productivity. *Ecol. Lett.*, 20, 505–512.
- Snaydon, R.W. & Davies, M.S. (1972). Rapid Population Differentiation in a Mosaic Environment. II. Morphological Variation in *Anthoxanthum odoratum*. *Evolution*, 26, 390.

- Sun, S., Lian, S., Feng, S., Dong, X., Wang, C. & Li, B. *et al.* (2017). Effects of Temperature and Moisture on Sporulation and Infection by *Pseudoperonospora cubensis*. *Plant Dis.*, 101, 562–567.
- Sundravadana, S., Devadason, A., Kuttalam, S. & Ramasamy, S. (2007). Efficacy of azoxystrobin on *Colletotrichum gloeosporioides* penz growth and on controlling mango anthracnose. *J. Agric. Biol. Sci.*, 2.
- Thrall, P.H. & Burdon, J.J. (2003). Evolution of virulence in a plant host-pathogen metapopulation. *Science*, 299, 1735–1737.
- Thrall, P.H., Hochberg, Michael E., Burdon, J.J. & Bever, J.D. (2007). Coevolution of symbiotic mutualists and parasites in a community context. *Trends Ecol. Evol.*, 22, 120–126.
- Tilman, D., Reich, P.B., Knops, J., Wedin, D., Mielke, T. & Lehman, C. (2001). Diversity and productivity in a long-term grassland experiment. *Science*, 294, 843–845.
- Veresoglou, S.D., Barto, E.K., Menexes, G. & Rillig, M.C. (2013). Fertilization affects severity of disease caused by fungal plant pathogens. *Plant Pathol.*, 62, 961–969.
- Welsh, M.E., Cronin, J.P. & Mitchell, C.E. (2016). The role of habitat filtering in the leaf economics spectrum and plant susceptibility to pathogen infection. *J. Ecol.*, 104, 1768–1777.
- Whitehead, D.C. (1970). *The role of nitrogen in grassland productivity. A review of information from temperate regions*. Commonwealth Agricultural Bureaux, Farnham Royal.
- Wright, I.J., Reich, P.B., Westoby, M., Ackerly, D.D., Baruch, Z. & Bongers, F. *et al.* (2004). The worldwide leaf economics spectrum. *Nature*, 428, 821–827.
- Zuppinger-Dingley, D., Flynn, D.F.B., Deyn, G.B. de, Petermann, J.S. & Schmid, B. Plant selection and soil legacy enhance long-term biodiversity effects. *Ecology*, 0.
- Zuur, A.F. (2009). *Mixed effects models and extensions in ecology with R*. 1st edn. Springer Science+Business Media, New York.



## FIGURES AND TABLES

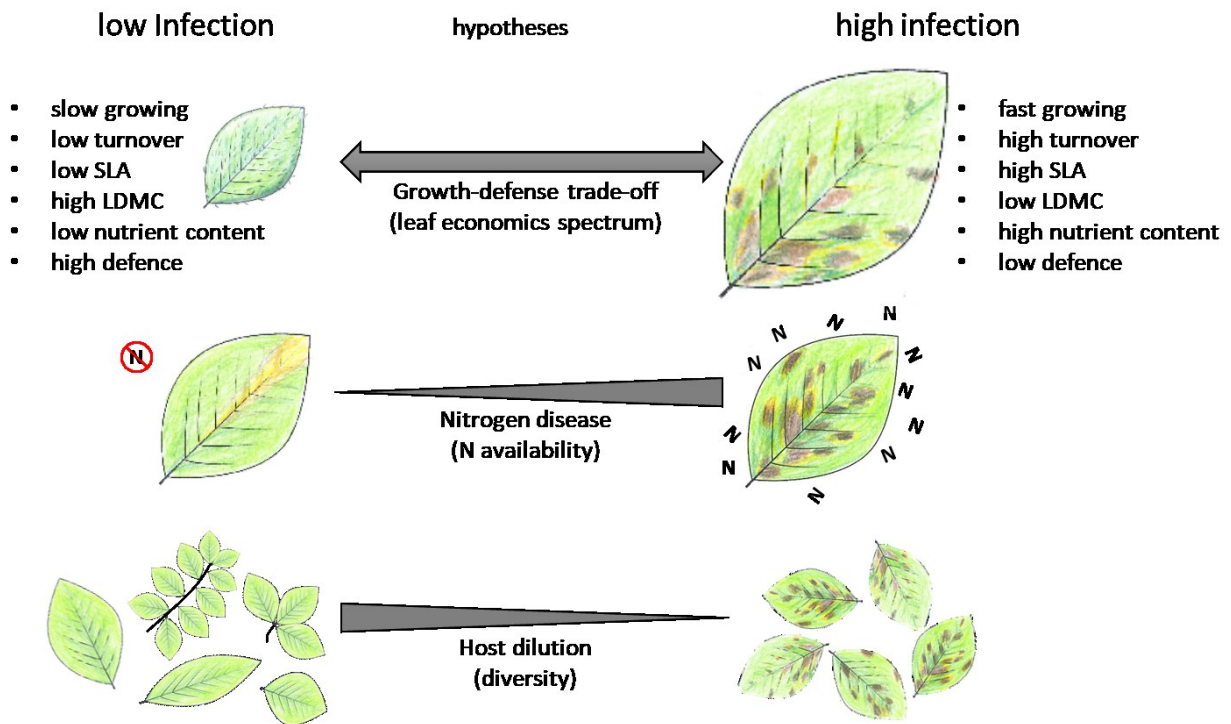

Figure 1 Overview over the main hypotheses which we tested. Growth-defense trade-off hypothesis: Plant species adapted to resource-rich environments and able to compete well under nutrient rich conditions are often less defended against natural enemies (Blumenthal *et al.* 2009; Liu *et al.* 2017). The growth strategy is defined by the leaf economics spectrum (Wright *et al.* 2004), which has been linked to certain disease resistance mechanisms (Cronin *et al.* 2014; Cronin *et al.* 2010; Huot *et al.* 2014). Nitrogen disease hypothesis: Higher nutrient content of the plant material following nitrogen fertilization should promote disease. This is known for agricultural systems (Dordas 2008), but results from natural ecosystems vary (Mitchell *et al.* 2003; Veresoglou *et al.* 2013). Host dilution hypothesis: Many pathogens are dependent on the availability and density of host plants. At high plant diversity the abundance of each host plant is in average lower than in species poor communities (Civitello *et al.* 2015), which is suggested to be the underlying mechanism of observed negative diversity-disease relationships (Lau *et al.* 2008; Knops *et al.* 1999; Mitchell 2003; Mitchell *et al.* 2003).

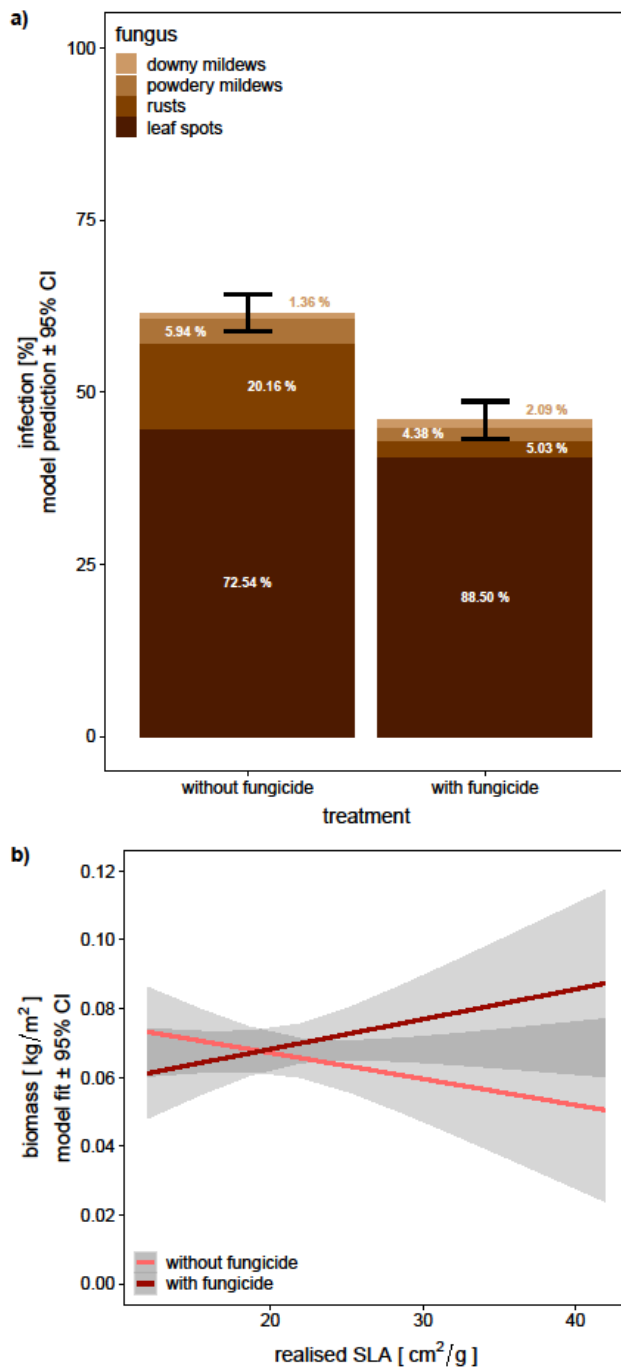

**Figure 2** Selected results from the linear mixed effects models: model predictions and 95% confidence interval of a) impact of fungicide treatment on fungal infection and the contribution of single fungal groups to overall infection. The numbers in the bars indicate the percentage contribution of each fungal group to the total infection. Main fungicide effects of the linear mixed effects models per fungal group: Fungicide reduced total infection from  $61.50 \pm 1.38$  % to  $45.92 \pm 1.39$  % ( $p < 0.001$ ), leaf spots from  $59.12 \pm 1.58$  % to  $46.90 \pm 1.57$  % ( $p < 0.001$ ), rusts from  $16.43 \pm 0.81$  to  $2.67 \pm 0.81$  % ( $p < 0.001$ ) and powdery mildews from  $4.85 \pm 0.53$  % to  $2.32 \pm 0.83$  % ( $p < 0.001$ ), while downy mildews were unaffected by fungicide ( $p = 0.623$ ) and were generally very low ( $1.11 \pm 0.39$  %). b) Interactive effect of realised SLA and fungicide on biomass production. Plots dominated by fast-growing species produced less biomass than plots dominated by slow-growing species. Fungicide increased biomass production, but only in plots dominated by fast-growing species. Under fungicide treatment there was even an increase of biomass with increasing realised SLA. Estimates and CI were derived from the effects package (Fox 2003). The whole model results can be found in Table S4 and Table S5.

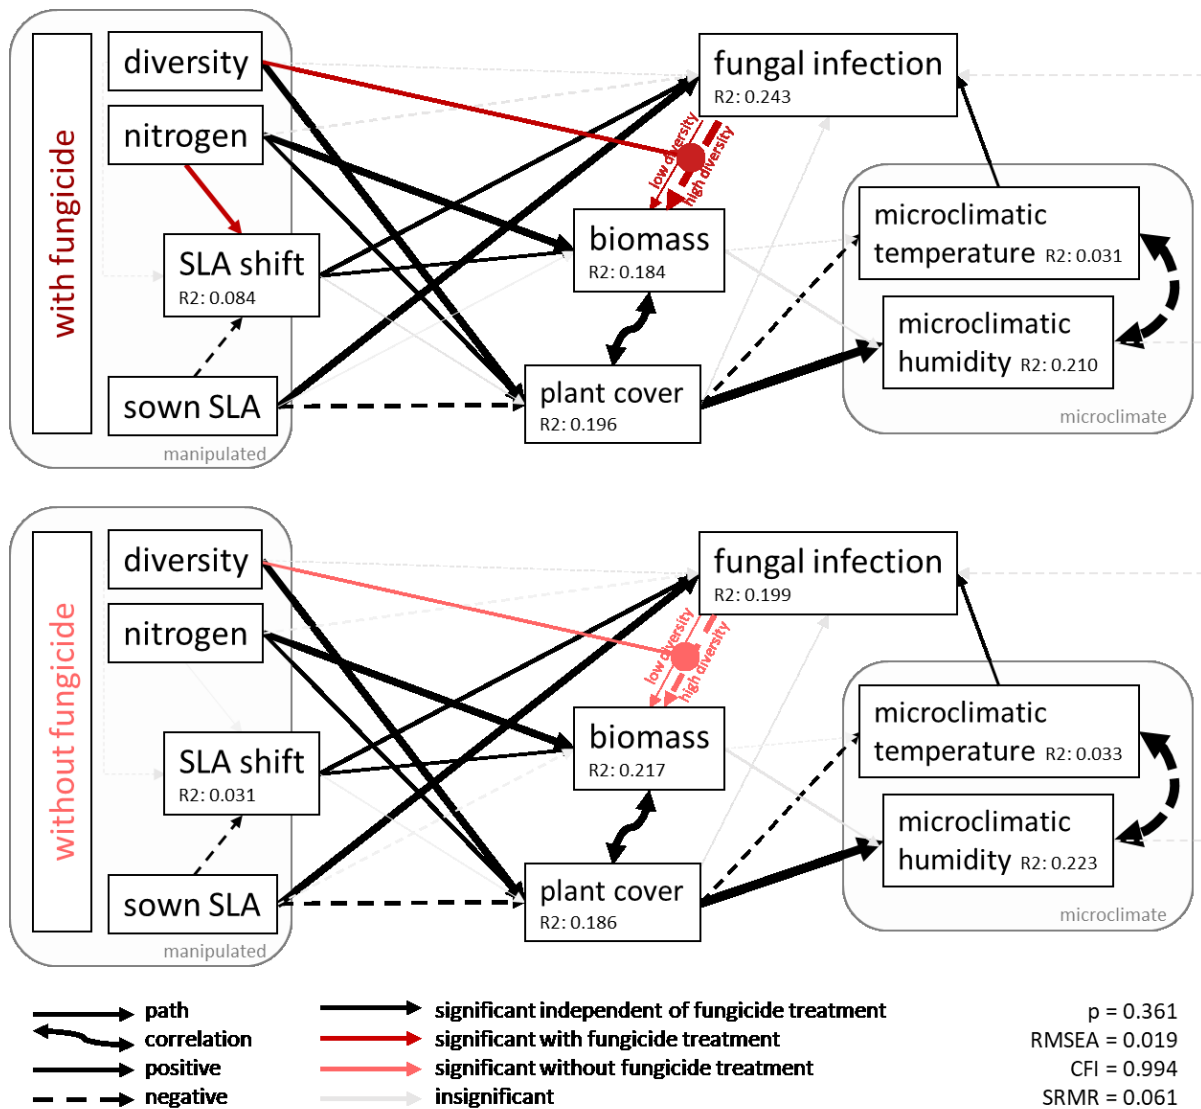

Figure 3 SEM: drivers and consequences of fungal infection. Dashed lines: negative effects. Solid lines: positive effects. Double headed arrows: correlations. Single headed arrows: paths. Black: significant constrained paths, red: significant unconstrained paths between fungicide (dark red) and no fungicide (light red). Light grey: not significant paths. Thickness: strength of the path/correlation.

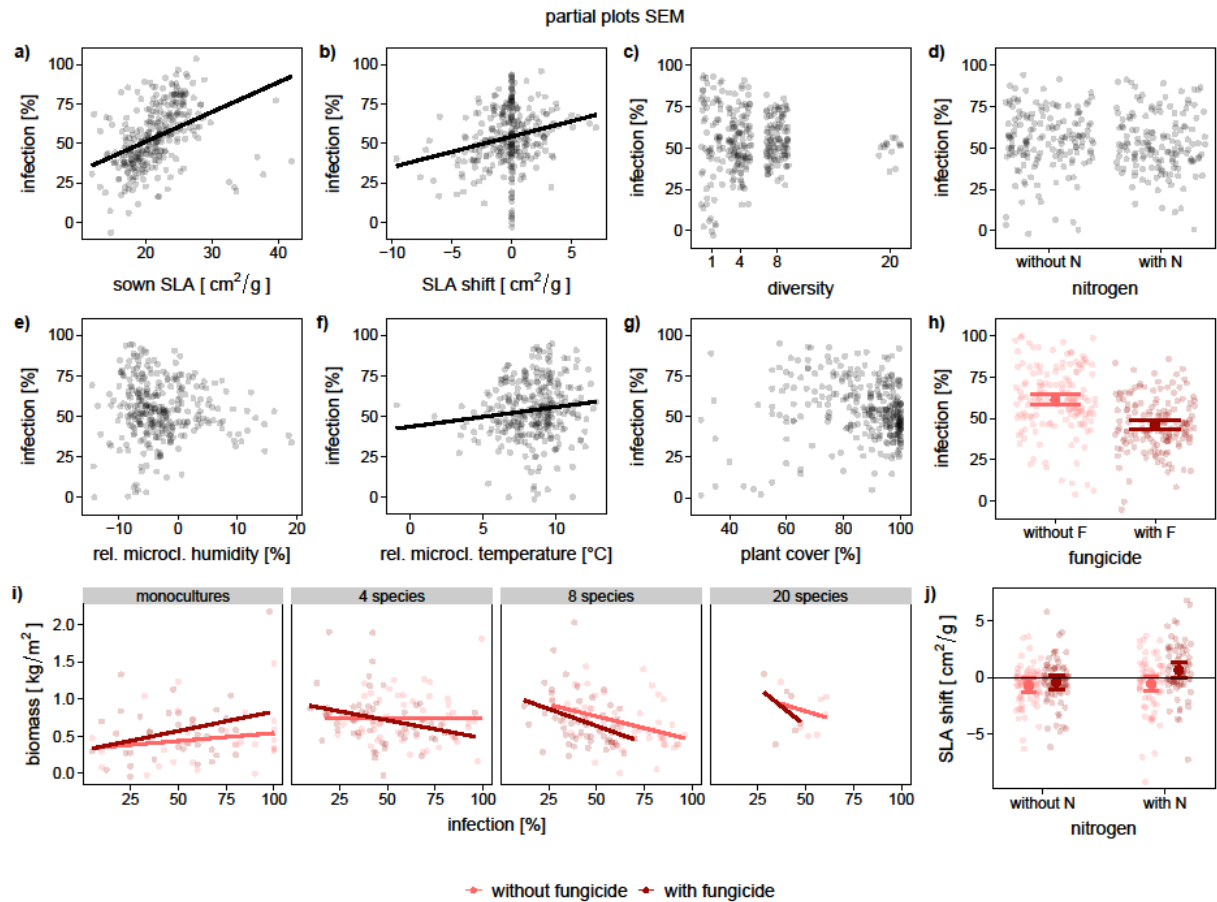

**Figure 4** Partial plots of the SEM: impact of selected variables on fungal infection (a-h), biomass production (i) and SLA shift (j) after removing all effects of all the other variables which are not plotted. Effects on fungal infection of a) sown SLA (0.331,  $p < 0.001$ ), b) SLA shift (0.186,  $p < 0.001$ ), c) diversity (-0.030,  $p = 0.551$ ), d) nitrogen (-0.079,  $p = 0.056$ ), e) microclimatic humidity (-0.082,  $p = 0.125$ ), f) microclimatic temperature (0.121,  $p = 0.012$ ), g) plant cover (-0.061,  $p = 0.227$ ) and h) fungicide  $\pm 95\%$  CI (-0.689,  $p < 0.001$ ) Interactive effects on biomass of i) fungicide, fungal infection and diversity and j) Interactive effects on SLA shift of nitrogen and fungicide estimate  $\pm 95\%$  & CI

## SUPPLEMENTARY

### Supplementary Methods

#### Experiment

We set up a large field experiment (PaNDiv Experiment) in the Swiss lowlands, close to the city of Bern (mean annual temperature and precipitation  $9.4 \pm 0.1^\circ\text{C}$ , respectively  $1021.62 \pm 31.89\text{mm}$ , MeteoSchweiz 2019). The grassland contains a species composition typical for a nutrient rich, rather dry, grazed grassland (Delarze 2015). We cleared an area of  $3145\text{m}^2$  ( $85\text{m} \times 37\text{m}$ ) of all vegetation in autumn 2015 and sowed our experimental plant communities. Some species were resown in spring 2016, because of poor establishment. The experiment consisted of 336  $2\text{m} \times 2\text{m}$  plots, separated by a 1m path sown with a grass seed mixture consisting of *Lolium perenne* and *Poa pratensis* (UFA-Regeneration Highspeed) and mown regularly during the growing season.

We factorially manipulated plant species richness, plant functional composition, nitrogen addition and foliar fungal pathogen exclusion. We used a set of 20 common grassland species to establish the experimental plant communities (Table S2). Half of the species were classified as fast, half as slow-growing based on specific leaf area (SLA) and leaf nitrogen content (Figure S2), which are traits indicative of the leaf economics spectrum (Reich & Cornelissen 2014; Wright *et al.* 2004). We did not include legumes in the species pool, because most legumes are adapted to low nitrogen levels and could therefore have been only included in the slow species pool only, making the species pools phylogenetically biased. The experimental communities contained either 1, 4, 8 or 20 species. Plots with 4 or 8 species could have either only slow-growing species, only fast-growing species or a mixture of both, which created a large gradient in community weighted mean traits. We grew monocultures of all species, which were either fast- or slow-growing, and the plots containing all 20 species inevitably had mixed functional compositions. The species for 4 and 8 species communities were chosen randomly from their respective species pools. To maintain species compositions, the plots were weeded three times a year. Plots were mown once in the middle of June and once in August, close to the dates when the farmers usually mow their extensive meadows (for more details see Pichon *et al.* (2019)).

## Conceptual SEM

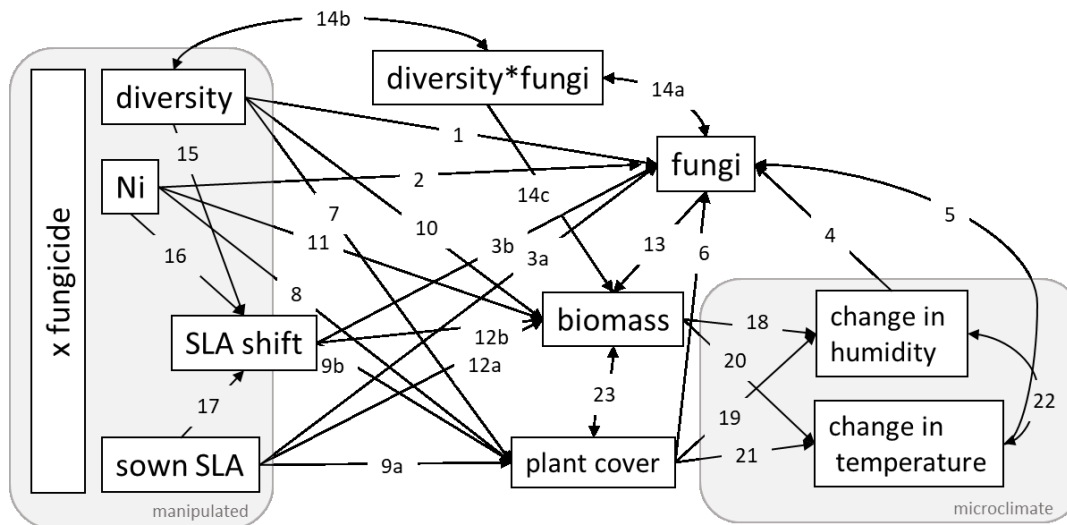

**Figure S1** The full SEM that we tested. We tested all paths from the manipulated variables (left box) to the measured variables. The numbered paths are explained in Table S1.

**Table S1** Hypothesized mechanism driving fungal infection and biomass production in the SEM model (Figure S1)

| Path   | Hypothesized mechanism                                                                                                         | Reference                                                                                                         |
|--------|--------------------------------------------------------------------------------------------------------------------------------|-------------------------------------------------------------------------------------------------------------------|
| 1      | (?/-) mostly negative diversity effect on infection in grasslands, through host dilution                                       | Rottstock <i>et al.</i> (2014), Mitchell <i>et al.</i> (2003), Mitchell <i>et al.</i> (2002)                      |
| 2      | (+) nitrogen disease                                                                                                           | Dordas (2008)                                                                                                     |
| 3      | (+) growth defense trade-off                                                                                                   | Wright <i>et al.</i> (2004)                                                                                       |
| 4      | (+) high humidity is often beneficial for fungal pathogen growth and sporulation                                               | Bregaglio <i>et al.</i> (2013), Chen <i>et al.</i> (2014), Sun <i>et al.</i> (2017), Bradley <i>et al.</i> (2003) |
| 5      | (+) an increase in temperature can increase fungal infection                                                                   | Liu <i>et al.</i> (2016), Roy <i>et al.</i> (2004)                                                                |
| 6      | (?/+) spillover of generalist fungi because of higher density of potential hosts                                               | Power & Mitchell (2004), Parker <i>et al.</i> (2015)                                                              |
| 7,10   | (+) positive diversity-productivity relationship                                                                               | Tilman <i>et al.</i> (2001)                                                                                       |
| 8,11   | (+) nitrogen increases productivity due to nutrient limitation                                                                 | Whitehead (1970), DiTommaso & Aarssen (1989), Fay <i>et al.</i> (2015)                                            |
| 9,12   | (+) high growth rate at high SLA                                                                                               | Reich <i>et al.</i> (1992), Lavorel & Grigulis (2012)                                                             |
| 13     | (-) consumption of biomass through fungal pathogens                                                                            | Allan <i>et al.</i> (2010), Seabloom <i>et al.</i> (2017)                                                         |
| 14     | (±) different selection pressure (due to host dilution), pathogen community composition shift                                  | Laine (2006), Roy <i>et al.</i> (2000)                                                                            |
| 15     | (±) increase in competition for light, sampling effect                                                                         | Bachmann <i>et al.</i> (2018)                                                                                     |
| 16     | (+) nitrogen enrichment favors the abundance of fast growing plants                                                            | Lavorel & Grigulis (2012), Liu <i>et al.</i> (2018), De Vries <i>et al.</i> (2012)                                |
| 17     | (±) likely the communities with extremely high/low sown SLA have the biggest negative/positive shifts towards intermediate SLA |                                                                                                                   |
| 18, 19 | (+) more plant transpiration in denser vegetation, shelter against wind that could remove humid air                            | Procházka <i>et al.</i> (2011)                                                                                    |
| 20, 21 | (-) more shading                                                                                                               | Procházka <i>et al.</i> (2011)                                                                                    |

**Table S2 PaNDiv experimental species.**

| Species                         | resource economics | group |
|---------------------------------|--------------------|-------|
| <i>Dactylis glomerata</i>       | fast               | grass |
| <i>Holcus lanatus</i>           | fast               | grass |
| <i>Lolium perenne</i>           | fast               | grass |
| <i>Poa trivialis</i>            | fast               | grass |
| <i>Anthriscus sylvestris</i>    | fast               | herb  |
| <i>Crepis biennis</i>           | fast               | herb  |
| <i>Galium album</i>             | fast               | herb  |
| <i>Heracleum sphondylium</i>    | fast               | herb  |
| <i>Rumex acetosa</i>            | fast               | herb  |
| <i>Taraxacum officinale</i>     | fast               | herb  |
| <i>Anthoxanthum odoratum</i>    | slow               | grass |
| <i>Bromus erectus</i>           | slow               | grass |
| <i>Festuca rubra</i>            | slow               | grass |
| <i>Helictotrichon pubescens</i> | slow               | grass |
| <i>Achillea millefolium</i>     | slow               | herb  |
| <i>Centaurea jacea</i>          | slow               | herb  |
| <i>Daucus carota</i>            | slow               | herb  |
| <i>Plantago media</i>           | slow               | herb  |
| <i>Prunella grandiflora</i>     | slow               | herb  |
| <i>Salvia pratensis</i>         | slow               | herb  |

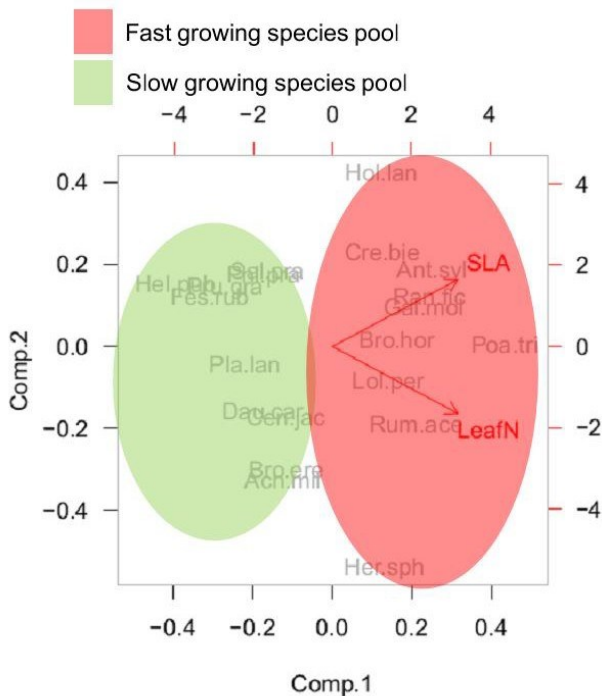

**Figure S2 PCA categorizing the experimental species as fast and slow growing based on their values of SLA and leaf nitrogen**

## Measurements

### *Measures of SLA*

By including the sown SLA and the SLA shift per plot, calculated based on the monoculture measurements with the corresponding nitrogen and fungicide treatment we accounted for abundance shifts and for plastic shifts following nitrogen and fungicide treatments, but not plastic shifts as a response to diversity. The latter, however is not significant compared to the plastic shifts as a response to nitrogen and fungicide (data not shown).

### *Infection*

Measuring the % of infected individuals is different from many studies, which measure infection as damaged leaf area (e.g. Mitchell (2003), Halliday *et al.* (2017)), but likely more suitable to compare different fungal groups, as some (e.g. powdery mildews) mainly grow on the leaf, while others (e.g. rusts) mainly grow in the leaves, which makes a big part of the infection invisible (Klenke 2015). Percent leaf area damaged and percent infected individuals are log-correlated (Figure S3) and are therefore not fundamentally different from each other.

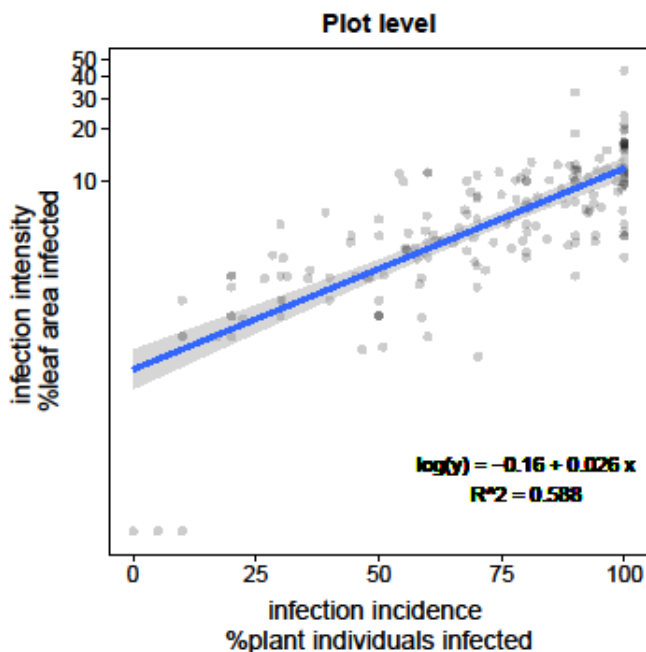

**Figure S3 Correlation between community weighted mean of infection intensity based on % leaf area infected and community weighted mean of infection incidence based on % infected individuals. Data from fall 2018, as damaged leaf area was only assessed in fall 2018.**



*Microclimate*

**Table S3 Dates when humidity and temperature loggers were placed in which plots**

| <b>Start</b> | <b>End</b> | <b>Plot numbers</b> |
|--------------|------------|---------------------|
| 16.7.2018    | 18.7.2018  | 239-252, 323-336    |
| 18.7.2018    | 20.7.2018  | 225-238, 309-322    |
| 20.7.2018    | 23.7.2018  | 211-224, 295-308    |
| 23.7.2018    | 28.7.2018  | 197-210, 281-294    |
| 28.7.2018    | 27.7.2018  | 183-196, 267-280    |
| 27.7.2018    | 30.7.2018  | 169-182, 253-266    |
| 30.7.2018    | 1.8.2018   | 71-84, 155-186      |
| 1.8.2018     | 3.8.2018   | 57-70, 141-154      |
| 3.8.2018     | 6.8.2018   | 43-56, 127-140      |
| 6.8.2018     | 8.8.2018   | 29-42, 113-126      |
| 8.8.2018     | 10.8.2018  | 15-28, 99-112       |
| 10.8.2018    | 13.8.2018  | 1-14, 85-89         |

## Supplementary Analyses

Table S4 fixed effects of the fungi lmer

| Fixed Effects                                | Estimate | SE      | t value | Chi <sup>2</sup> | p-value  |
|----------------------------------------------|----------|---------|---------|------------------|----------|
| Intercept                                    | 0.42213  | 0.09771 | 4.32    |                  | marginal |
| Nitrogen                                     | -0.10653 | 0.08237 | -1.293  |                  | marginal |
| Fungicide                                    | -0.78739 | 0.08393 | -9.382  |                  | marginal |
| Species Diversity                            | -0.02767 | 0.08368 | -0.331  |                  | marginal |
| Realized SLA                                 | 0.48125  | 0.08995 | 5.35    |                  | marginal |
| Nitrogen x Fungicide                         | 0.08203  | 0.12109 | 0.677   |                  | marginal |
| Fungicide x Species Diversity                | -0.06974 | 0.05908 | -1.18   |                  | marginal |
| Nitrogen x Realized SLA                      | -0.13115 | 0.08343 | -1.572  |                  | marginal |
| Fungicide x Realized SLA                     | -0.40054 | 0.09638 | -4.156  |                  | marginal |
| Species Diversity x Realized SLA             | 0.23772  | 0.08665 | 2.743   |                  | marginal |
| Nitrogen x Fungicide x Realized SLA          | 0.36719  | 0.12227 | 3.003   | 9.187            | 0.002    |
| Species Diversity x Fungicide x Realized SLA | -0.223   | 0.09118 | -2.446  | 6.128            | 0.013    |
| Random Effects                               | Variance | SD      |         |                  |          |
| Composition                                  | 0.4232   | 0.6505  |         |                  |          |
| Block                                        | 0.0031   | 0.0560  |         |                  |          |

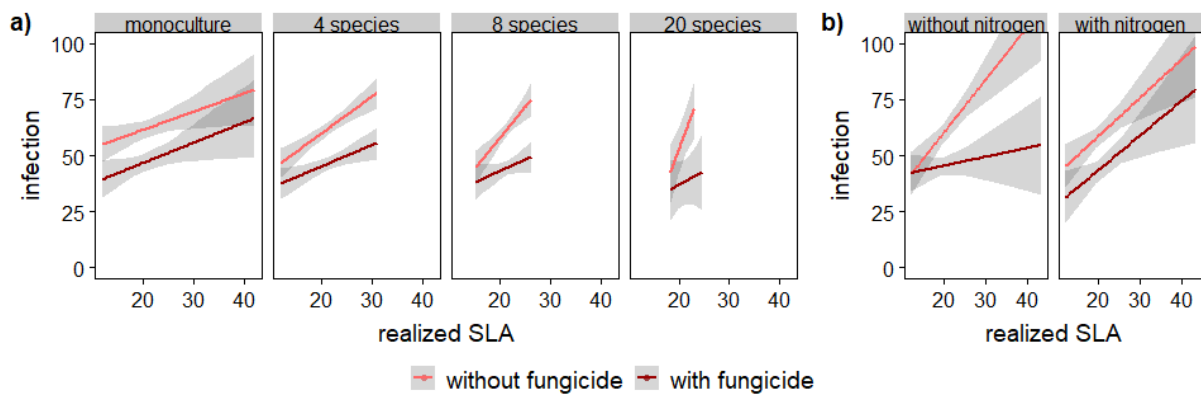

Figure S4 model predictions of lmer for fungal infection of all significant interactions terms (obtained from the effect package in r (Fox 2003)). Fungicide had significant interactions with a) fungicide, realized SLA and plant species diversity in explaining fungal infection, and with b) SLA as well as nitrogen in explaining biomass production. Fungicide reduced fungal infection on average ( $t$ -value= -11.942, infection without fungicide:  $61.50 \pm 1.38$  %, infection with fungicide:  $45.92 \pm 1.39$  %). Estimates and CI were derived from the effects package (Fox 2003)

**Table S5 fixed effects of the biomass lmer**

| Fixed Effects            | Estimate | SE     | t value | Chi <sup>2</sup> | p-value  |
|--------------------------|----------|--------|---------|------------------|----------|
| Intercept                | -0.3259  | 0.1393 | -2.3400 |                  | marginal |
| Nitrogen                 | 0.5828   | 0.0881 | 6.6120  | 41.49            | <0.001   |
| Fungicide                | 0.0779   | 0.0864 | 0.9019  |                  | marginal |
| Realized SLA             | -0.0865  | 0.0768 | -1.1266 |                  | marginal |
| Species Diversity        | 0.1374   | 0.0688 | 1.9966  | 3.999            | 0.046    |
| Fungicide x Realized SLA | 0.1859   | 0.0879 | 2.1138  | 4.518            | 0.034    |
| Random Effects           | Variance | SD     |         |                  |          |
| Composition              | 0.2340   | 0.4837 |         |                  |          |
| Block                    | 0.0330   | 0.1817 |         |                  |          |

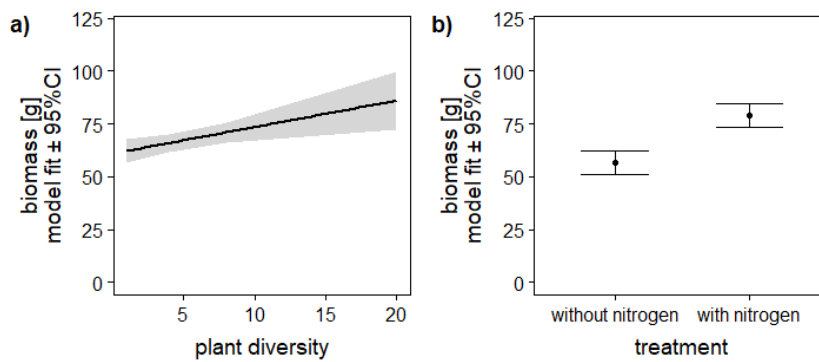

**Figure S5 model predictions of the biomass lmer for a) plant diversity and b) nitrogen treatment (obtained from the effect package in r (Fox 2003)).**

**Table S6 Results from the SEM model constrain criteria, where we tested whether paths and intercepts differed significantly with fungicide, by comparing the AIC values of a fully unconstrained model with a model where a particular paths was constrained to be equal between fungicide treatments. Note that we did not constrain the path between biomass and fungal infection, even though it does not significantly differ between treatments. Fungal infection is part of the interaction term, which cannot be constrained, we therefore did not constrain any paths that are part of this interaction.**

|                                        |                         | p value  |     |
|----------------------------------------|-------------------------|----------|-----|
| SLA shift ~                            | Intercept               | 0.00184  | **  |
|                                        | Nitrogen                | 0.03828  | *   |
|                                        | Plant Diversity         | 0.1991   |     |
|                                        | Sown SLA                | 0.3178   |     |
| Fungal Infection ~                     | Intercept               | 1.36E-11 | *** |
|                                        | Nitrogen                | 0.9706   |     |
|                                        | Plant Diversity         | 0.3293   |     |
|                                        | Sown SLA                | 0.7754   |     |
|                                        | SLA Shift               | 0.7412   |     |
|                                        | Humidity                | 0.7573   |     |
|                                        | Temperature             | 0.5982   |     |
|                                        | Plant Cover             | 0.6994   |     |
|                                        |                         |          |     |
| Plant cover~                           | Intercept               | 0.143    |     |
|                                        | Nitrogen                | 0.5777   |     |
|                                        | Plant Diversity         | 0.9497   |     |
|                                        | Sown SLA                | 0.07047  | .   |
|                                        | SLA Shift               | 0.441    |     |
| Humidity~                              | Intercept               | 0.8263   |     |
|                                        | Plant Cover             | 0.8938   |     |
|                                        | Biomass                 | 0.838    |     |
| Temperature~                           | Intercept               | 0.8052   |     |
|                                        | Plant Cover             | 0.9976   |     |
|                                        | Biomass                 | 0.5632   |     |
| Biomass~                               | Intercept               | 0.4208   |     |
|                                        | Nitrogen                | 0.8657   |     |
|                                        | Plant Diversity         | 0.02808  | *   |
|                                        | Sown SLA                | 0.01775  | *   |
|                                        | Fungal Infection        | 0.1295   |     |
|                                        | Fungi x Plant Diversity | 0.02808  | *   |
|                                        | SLA Shift               | 0.1629   |     |
| Humidity ~ ~                           | Temperature             | 0.9887   |     |
| Plant cover ~ ~                        | Biomass                 | 0.2556   |     |
| Fungal Infection x Plant Diversity ~ ~ | Plant Diversity         | 1.47E-11 | *** |
|                                        | Fungi                   | 0.4388   |     |

**Table S7 model fit indices of fully unconstrained model ant the final constrained model.**

| model         | DF | AIC    | P     | RMSEA | CFI   | SRMR  |
|---------------|----|--------|-------|-------|-------|-------|
| unconstrained | 34 | 7945.6 | 0.204 | 0.036 | 0.989 | 0.045 |
| constrained   | 64 | 7912.4 | 0.361 | 0.019 | 0.994 | 0.061 |

**Table S8 SEM path, correlation and intercept estimates with and without fungicide treatment for the standardized data. Paths/correlations/intercepts labelled with c have been constrained, because they do not significantly differ between fungicide treatments.**

| Path              |                       | with fungicide |       |         |         | without fungicide |       |         |         |
|-------------------|-----------------------|----------------|-------|---------|---------|-------------------|-------|---------|---------|
|                   |                       | Estimate       | S.E.  | z-value | p-value | Estimate          | S.E.  | z-value | p-value |
| Regressions:      |                       |                |       |         |         |                   |       |         |         |
| Response          | Predictor             |                |       |         |         |                   |       |         |         |
| SLA shift         | nitrogen              | 0.245          | 0.077 | 3.196   | 0.001   | 0.027             | 0.075 | 0.364   | 0.716   |
|                   | plant diversity       | c -0.069       | 0.054 | -1.266  | 0.206   | -0.069            | 0.054 | -1.266  | 0.206   |
|                   | sown SLA              | c -0.144       | 0.054 | -2.672  | 0.008   | -0.144            | 0.054 | -2.672  | 0.008   |
| fungal infection  | nitrogen              | c -0.079       | 0.042 | -1.908  | 0.056   | -0.079            | 0.042 | -1.908  | 0.056   |
|                   | plant diversity       | c -0.03        | 0.05  | -0.597  | 0.551   | -0.03             | 0.05  | -0.597  | 0.551   |
|                   | sown SLA              | c 0.331        | 0.042 | 7.933   | 0       | 0.331             | 0.042 | 7.933   | 0       |
|                   | SLA shift             | c 0.186        | 0.042 | 4.426   | 0       | 0.186             | 0.042 | 4.426   | 0       |
|                   | micr. humidity        | c -0.082       | 0.054 | -1.535  | 0.125   | -0.082            | 0.054 | -1.535  | 0.125   |
|                   | micr. temperature     | c 0.121        | 0.048 | 2.509   | 0.012   | 0.121             | 0.048 | 2.509   | 0.012   |
| plant cover       | plant cover           | c -0.061       | 0.051 | -1.209  | 0.227   | -0.061            | 0.051 | -1.209  | 0.227   |
|                   | nitrogen              | c 0.195        | 0.051 | 3.835   | 0       | 0.195             | 0.051 | 3.835   | 0       |
|                   | plant diversity       | c 0.355        | 0.051 | 6.937   | 0       | 0.355             | 0.051 | 6.937   | 0       |
|                   | sown SLA              | c -0.192       | 0.051 | -3.742  | 0       | -0.192            | 0.051 | -3.742  | 0       |
|                   | SLA shift             | c 0.006        | 0.052 | 0.107   | 0.915   | 0.006             | 0.052 | 0.107   | 0.915   |
| micr. humidity    | plant cover           | c 0.431        | 0.059 | 7.273   | 0       | 0.431             | 0.059 | 7.273   | 0       |
|                   | biomass               | c 0.071        | 0.06  | 1.198   | 0.231   | 0.071             | 0.06  | 1.198   | 0.231   |
| micr. temperature | plant cover           | c -0.164       | 0.066 | -2.488  | 0.013   | -0.164            | 0.066 | -2.488  | 0.013   |
|                   | biomass               | c -0.027       | 0.067 | -0.409  | 0.683   | -0.027            | 0.067 | -0.409  | 0.683   |
| biomass           | nitrogen              | c 0.313        | 0.051 | 6.193   | 0       | 0.313             | 0.051 | 6.193   | 0       |
|                   | sown SLA              | c 0.031        | 0.081 | 0.384   | 0.701   | -0.119            | 0.067 | -1.779  | 0.075   |
|                   | SLA shift             | c 0.137        | 0.053 | 2.592   | 0.01    | 0.137             | 0.053 | 2.592   | 0.01    |
|                   | fungal infection      | c -0.168       | 0.096 | -1.747  | 0.081   | -0.056            | 0.069 | -0.814  | 0.416   |
|                   | plant diversity       | c -0.054       | 0.099 | -0.544  | 0.586   | 0.191             | 0.065 | 2.921   | 0.003   |
|                   | infection x diversity | c -0.362       | 0.115 | -3.148  | 0.002   | -0.124            | 0.08  | -1.55   | 0.121   |
| Indirect paths    |                       |                |       |         |         |                   |       |         |         |
| Fungal infection  | p. div. – humidity    | c -0.013       | 0.009 | -1.458  | 0.145   | -0.013            | 0.009 | -1.458  | 0.145   |
|                   | N. – humidity         | c -0.007       | 0.005 | -1.390  | 0.164   | -0.007            | 0.005 | -1.390  | 0.164   |
|                   | s. SLA - humidity     | c 0.007        | 0.005 | 1.386   | 0.166   | 0.007             | 0.005 | 1.386   | 0.166   |
| Covariances:      |                       |                |       |         |         |                   |       |         |         |
| micr. humidity    | micr. temperature     | c -0.463       | 0.057 | -8.168  | 0       | -0.463            | 0.057 | -8.168  | 0       |
| plant cover       | biomass               | c 0.328        | 0.048 | 6.793   | 0       | 0.328             | 0.048 | 6.793   | 0       |
| fungal infection  | infection x diversity | c -0.292       | 0.038 | -7.668  | 0       | -0.292            | 0.038 | -7.668  | 0       |
| plant diversity   | infection x diversity | c -0.518       | 0.077 | -6.74   | 0       | 0.195             | 0.067 | 2.909   | 0.004   |
| nitrogen          | plant diversity       | 0              |       |         |         | 0                 |       |         |         |
| plant diversity   | sown SLA              | 0              |       |         |         | 0                 |       |         |         |
| nitrogen          | sown SLA              | 0              |       |         |         | 0                 |       |         |         |
| Intercepts:       |                       |                |       |         |         |                   |       |         |         |
|                   | SLA shift             | 0.177          | 0.077 | 2.306   | 0.021   | -0.164            | 0.075 | -2.185  | 0.029   |
|                   | fungal infection      | -0.352         | 0.061 | -5.786  | 0       | 0.337             | 0.074 | 4.57    | 0       |
|                   | plant cover           | c 0.017        | 0.05  | 0.339   | 0.735   | 0.017             | 0.05  | 0.339   | 0.735   |
|                   | micr. humidity        | c 0.008        | 0.051 | 0.153   | 0.878   | 0.008             | 0.051 | 0.153   | 0.878   |
|                   | micr. temperature     | c -0.005       | 0.056 | -0.082  | 0.934   | -0.005            | 0.056 | -0.082  | 0.934   |
|                   | biomass               | c -0.044       | 0.054 | -0.824  | 0.41    | -0.044            | 0.054 | -0.824  | 0.41    |
|                   | plant diversity       | c -0.002       | 0.056 | -0.041  | 0.967   | -0.002            | 0.056 | -0.041  | 0.967   |
|                   | nitrogen              | c -0.02        | 0.057 | -0.344  | 0.731   | -0.02             | 0.057 | -0.344  | 0.731   |
|                   | sown SLA              | c -0.005       | 0.057 | -0.081  | 0.935   | -0.005            | 0.057 | -0.081  | 0.935   |
|                   | infection x diversity | c -0.102       | 0.062 | -1.644  | 0.1     | -0.072            | 0.068 | -1.06   | 0.289   |
| Variances:        |                       |                |       |         |         |                   |       |         |         |
|                   | SLA shift             | 0.917          | 0.104 | 8.832   | 0       | 0.83              | 0.096 | 8.602   | 0       |
|                   | fungal infection      | 0.568          | 0.059 | 9.7     | 0       | 0.798             | 0.084 | 9.501   | 0       |
|                   | plant cover           | 0.689          | 0.072 | 9.567   | 0       | 0.87              | 0.093 | 9.362   | 0       |
|                   | micr. humidity        | 0.76           | 0.076 | 9.951   | 0       | 0.812             | 0.083 | 9.766   | 0       |
|                   | micr. temperature     | 0.941          | 0.095 | 9.95    | 0       | 1.003             | 0.103 | 9.765   | 0       |
|                   | biomass               | 0.891          | 0.093 | 9.556   | 0       | 0.656             | 0.07  | 9.354   | 0       |
|                   | nitrogen              | 0.997          | 0.113 | 8.832   | 0       | 0.996             | 0.116 | 8.602   | 0       |
|                   | plant diversity       | 0.961          | 0.109 | 8.832   | 0       | 0.98              | 0.114 | 8.602   | 0       |
|                   | sown SLA              | 0.949          | 0.107 | 8.832   | 0       | 1.027             | 0.119 | 8.602   | 0       |
|                   | infection x diversity | 0.741          | 0.078 | 9.462   | 0       | 0.706             | 0.075 | 9.447   | 0       |

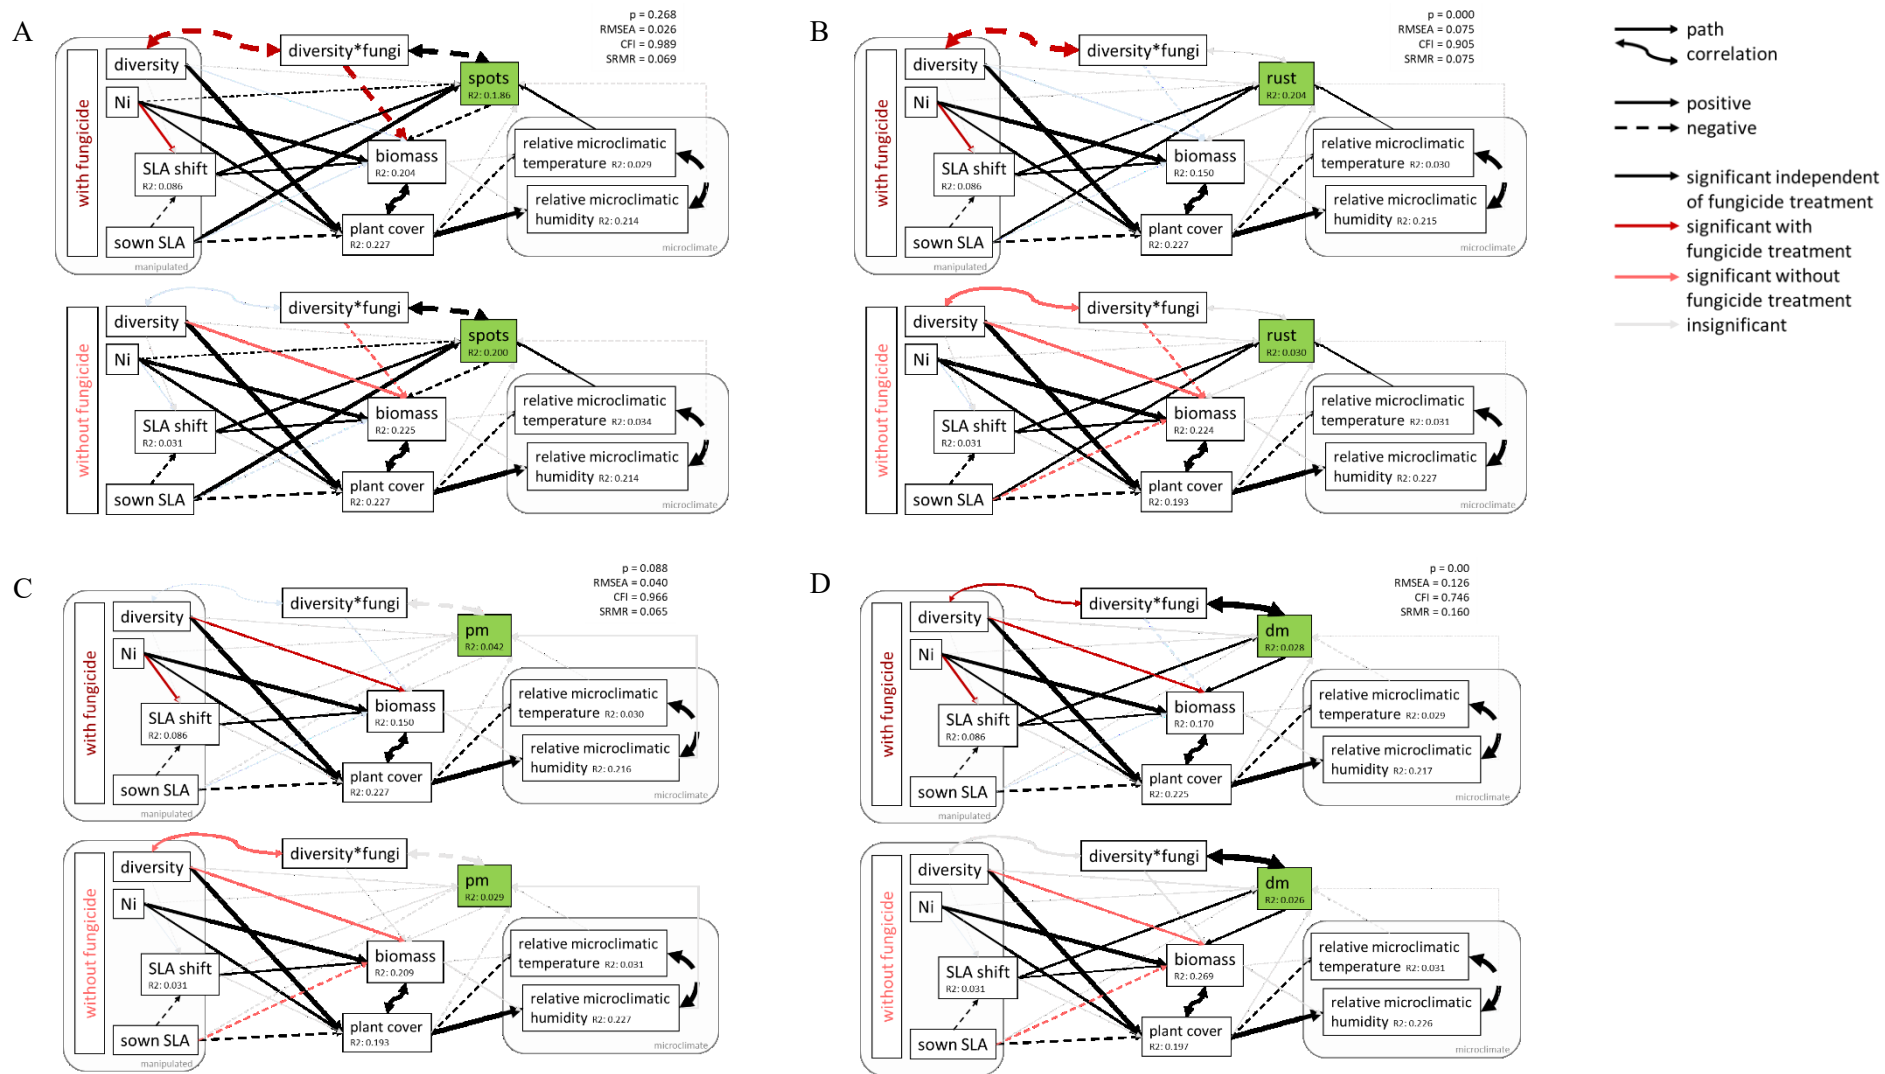

Figure S6 SEM results for the different fungal groups (A: leaf spots, B: rusts, C: powdery mildews, D: downy mildews)

**Table S9 Fixed effects of the host concentration lmer (Bates *et al.* 2015), with helmert contrasts. Model: host concentration slope ~ Nitrogen + Fungicide + Nitrogen x Fungicide + (1|Species)**

| Fixed Effects        | Estimate | S.E.   | t-value |
|----------------------|----------|--------|---------|
| Intercept            | 0.2262   | 0.0678 | 3.34    |
| Nitrogen             | -0.0681  | 0.0505 | -1.35   |
| Fungicide            | -0.1003  | 0.0505 | -1.99   |
| Nitrogen x Fungicide | -0.0006  | 0.0505 | -0.01   |
| Random Effects       | Variance | SD     |         |
| Species              | 0.0410   | 0.2025 |         |

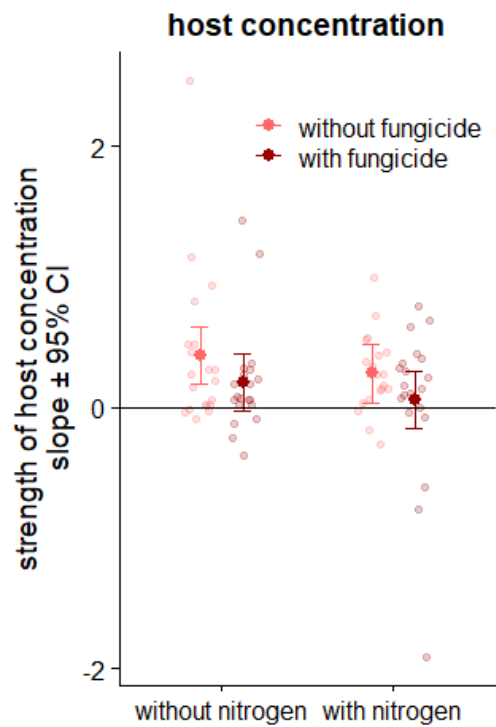

**Figure S7 host concentration effect per nitrogen and fungicide treatment, raw data, predicted values and 95% confidence interval (obtained from the effect package in r (Fox 2003)).**
